## REDUCTION FOR STOCHASTIC BIOCHEMICAL REACTION NETWORKS WITH MULTISCALE CONSERVATIONS\*

JAE KYOUNG KIM<sup>†</sup>, GRZEGORZ A. REMPALA<sup>‡</sup>, AND HYE-WON KANG<sup>§</sup>

**Abstract.** Biochemical reaction networks frequently consist of species evolving on multiple timescales. Stochastic simulations of such networks are often computationally challenging and therefore various methods have been developed to obtain sensible stochastic approximations on the timescale of interest. One of the rigorous and popular approaches is the multiscale approximation method for continuous time Markov processes. In this approach, by scaling species abundances and reaction rates, a family of processes parameterized by a scaling parameter is defined. The limiting process of this family is then used to approximate the original process. However, we find that such approximations become inaccurate when combinations of species with disparate abundances either constitute conservation laws or form virtual slow auxiliary species. To obtain more accurate approximation in such cases, we propose here an appropriate modification of the original method.

**Key words.** biochemical reaction networks, stochastic system, continuous-time Markov chain, multiscale approximation, singular perturbation theory, timescale separation

**AMS subject classifications.** 60J27, 60J28, 34E15, 92C42, 92B25, 92C45

**DOI.** 10.1137/16M1099443

**1. Introduction.** Biochemical reaction networks frequently evolve with disparate timescales. The simulations of the stochastic system describing such multiscale biochemical reaction networks are extremely slow because the computation is predominantly spent on simulating fast reactions [10, 12, 21, 50]. One approach to resolve this problem is using disparate timescales among species [14, 51, 58]. Fast species regulated by fast reactions will quickly equilibrate to a quasi-steady-state (QSS), while other species (slow species) will continue to evolve slowly on a different timescale (slow timescale). Thus, on the slow timescale, the fast species are assumed in QSS, which is determined by the evolution of slow species. By replacing the fast species with their QSS, we can derive the reduced stochastic system depending solely on the slow species. Such a reduced system accurately approximates the slow timescale dynamics of the original full stochastic system with a much lower computational cost.

However, in most systems with nonlinear reactions, deriving the exact QSS is difficult, and thus various approximations for QSS have been proposed [6, 8, 11, 13, 25, 28, 48, 49, 50, 53, 54, 59]. Since typically the accuracy of such approximations has been investigated numerically due to the lack of analytical tools, their validity is

---

\*Received by the editors October 18, 2016; accepted for publication (in revised form) April 17, 2017; published electronically October 12, 2017.

<http://www.siam.org/journals/mms/15-4/M109944.html>

**Funding:** This work was supported by the National Science Foundation grant DMS-0931642 to the Mathematical Biosciences Institute. The first author was supported by National Foundation of Korea grant N01160447, KAIST Research Allowance grant G04150020, and a TJ Park Science Fellowship of POSCO TJ Park Foundation. The second author was supported by National Science Foundation grant DMS-1318886. The third author was supported by National Science Foundation grant DMS-1620403 and UMBC KAN3STRT.

<sup>†</sup>Department of Mathematical Sciences, Korea Advanced Institute of Science and Technology, Republic of Korea (jaekkim@kaist.ac.kr).

<sup>‡</sup>Division of Biostatistics and Mathematical Biosciences Institute, Ohio State University, Columbus, OH 43210 (rempala.3@osu.edu).

<sup>§</sup>Department of Mathematics and Statistics, University of Maryland, Baltimore County, Baltimore, MD 21250 (hwkang@umbc.edu).

difficult to fully establish. Indeed, recent studies have shown the potential inaccuracy of a popular approach based on a deterministically derived QSS (e.g., Michaelis–Menten function) [1, 9, 40, 41, 55, 56]. These results indicate the need for justification of the QSS approximation using theoretical analysis [23, 32, 47].

One method allowing for a rigorous analysis is the multiscale approximation method, which was first introduced in [5] and further developed and systemized in [34]. The method is based on the idea of scaling species abundances, reaction rate constants, and time with a common scaling parameter to define a family of processes indexed by the scaling parameter. The limit of the family is then used to approximate the original process on the timescale of interest. This multiscale approximation method has provided accurate approximate reduced models for various multiscale stochastic biochemical reaction networks, including the complex model of the heat shock response in *E. coli* [33, 34, 35]. The multiscale approximation method allows for a rigorous analysis of the accuracy of the reduced model using theorems in stochastic analysis such as the law of large numbers and the martingale central limiting theorem [35]. Recently, this method was extended to study the chemical reaction-diffusion networks [52]. The scaling method developed for the multiscale approximation has also been used to derive various tools to study chemical reaction networks having a multiscale nature, such as hybrid approximation and its simulation algorithms [19, 20, 29], parameter sensitivity analysis [26, 27], and error analysis for stochastic numerical schemes [3, 4].

The current paper proposes the modified multiscale approximation method, which leads to accurate approximations for a broader class of multiscale stochastic biochemical reaction networks than the original method. Even though we concentrate, for the sake of simplicity, on two specific examples of networks, our proposed approach is seen to apply more broadly. The paper is organized as follows. In section 2, we briefly review the procedure of the original stochastic multiscale approximation using an example of the Michaelis–Menten enzyme kinetics. We also point out that the resulting reduced model does not accurately approximate the original model if the system has conservation laws involving species whose abundances are on disparate scales. To improve the accuracy, we propose a modification for the multiscale approximation method in section 3. In section 4, using an example of the genetic oscillatory system, we show that the stochastic multiscale approximation leads to an inaccurate approximation if the approximation uses a slow auxiliary variable, the combination of fast species whose abundances are on disparate scales. On the other hand, for such system, our modified multiscale approximation method leads to an accurate approximation. In section 5, we summarize our results and discuss future work. The details of our analysis described in the main text are provided in the appendix.

**2. Stochastic multiscale approximation method.** In this section, we review the multiscale approximation method [5, 33, 34] and describe its limitations under conservation laws involving species with disparate molecular abundances. Consider a Michaelis–Menten enzyme kinetics with a product converting back to substrate [1, 40]. This system consists of four reactions as described in Figure 1(a) and Table 1: a free enzyme ( $E$ ) reversibly binds with a substrate ( $S$ ) to form a complex ( $C$ ) and then the complex irreversibly dissociates into a product ( $P$ ) and a free enzyme. The product is assumed to be converted back to the substrate so that the substrate concentration is nonzero at the steady state. Propensity functions corresponding to these four reactions are derived based on the mass action kinetics by defining  $X_i(t)$  be the abundance of the  $i$ th species at time  $t$  (Table 1).

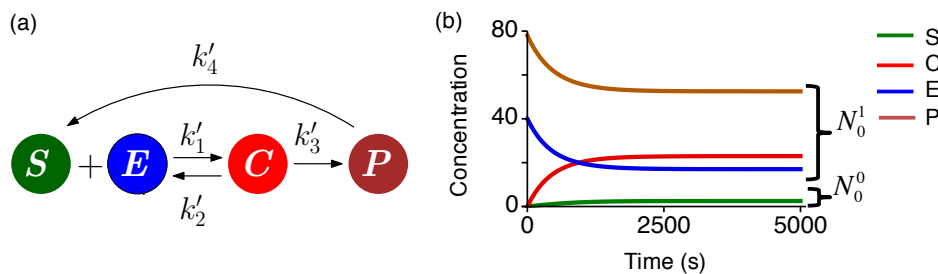

FIG. 1. *Michaelis–Menten kinetics with a convertible product.* (a) *The diagram of the biochemical reaction network.* (b) *The simulations of ordinary differential equations, which are large volume limits of stochastic systems (2). When converting stochastic propensity functions to macroscopic reaction rates, volume  $V = 1/nM$  is assumed. Here,  $S(0) = C(0) = 0$ ,  $E(0) = E_T(40nM)$ , and  $P(0) = S_T(80nM)$ . For  $N_0 = 10$ , the scaling exponents for species abundance (i.e.,  $\alpha_i$ ) are set to 0 for  $S$  and 1 for others at the steady state.*

TABLE 1

Reactions and propensity functions of the Michaelis–Menten kinetics with a convertible product.  $\kappa'_i$  are stochastic reaction rate constants with units in the number of molecules rather than concentrations.  $X_i(t)$  is the number of molecules of the  $i$ th species at time  $t$ .

| Reactions                         | Propensity functions                 |
|-----------------------------------|--------------------------------------|
| $S + E \xrightarrow{\kappa'_1} C$ | $\lambda'_1(X) := \kappa'_1 X_S X_E$ |
| $C \xrightarrow{\kappa'_2} S + E$ | $\lambda'_2(X) := \kappa'_2 X_C$     |
| $C \xrightarrow{\kappa'_3} P + E$ | $\lambda'_3(X) := \kappa'_3 X_C$     |
| $P \xrightarrow{\kappa'_4} S$     | $\lambda'_4(X) := \kappa'_4 X_P$     |

Let  $R_k^t(\cdot)$  be a counting process for the number of occurrences of the  $k$ th reaction up to time  $t$  defined as

$$(1) \quad R_k^t(\lambda'_k(X)) := Y_k \left( \int_0^t \lambda'_k(X(s)) ds \right),$$

where  $Y_k$  are independent unit Poisson processes, and  $\lambda'_k(X)$  are the propensity functions of the  $k$ th reaction given in Table 1. With these counting processes, we can derive the system of stochastic equations describing the state of  $X_i(t)$ :

$$(2) \quad \begin{aligned} X_S(t) &= X_S(0) + R_2^t(\lambda'_2(X)) + R_4^t(\lambda'_4(X)) - R_1^t(\lambda'_1(X)), \\ X_E(t) &= X_E(0) + R_2^t(\lambda'_2(X)) + R_3^t(\lambda'_3(X)) - R_1^t(\lambda'_1(X)), \\ X_C(t) &= X_C(0) + R_1^t(\lambda'_1(X)) - R_2^t(\lambda'_2(X)) - R_3^t(\lambda'_3(X)), \\ X_P(t) &= X_P(0) + R_3^t(\lambda'_3(X)) - R_4^t(\lambda'_4(X)). \end{aligned}$$

In this system, the total numbers of molecules of the substrate ( $X_{S_T}$ ) and the enzyme ( $X_{E_T}$ ) are conserved over time:

$$(3) \quad X_{S_T} := X_S(t) + X_C(t) + X_P(t) = X_S(0) + X_C(0) + X_P(0),$$

$$(4) \quad X_{E_T} := X_C(t) + X_E(t) = X_C(0) + X_E(0).$$

In the following subsections, we briefly describe how to derive the reduced system approximating the slow-scale dynamics of (2) with the multiscale approximation method [5, 33, 34].

TABLE 2

Normalized reaction rate constants. The values of reaction rate constants are adopted from [40].

| Name        | Description                             | Values & normalized rates ( $\kappa_i$ )               |
|-------------|-----------------------------------------|--------------------------------------------------------|
| $\kappa'_1$ | Binding rate constant for $E$ to $S$    | $0.017/s = 10^{-2} \times 1.7/s =: N_0^{-2} \kappa_1$  |
| $\kappa'_2$ | Unbinding rate constant for $C$         | $0.03/s = 10^{-2} \times 3/s =: N_0^{-2} \kappa_2$     |
| $\kappa'_3$ | Production rate constant for $P$        | $0.0016/s = 10^{-3} \times 1.6/s =: N_0^{-3} \kappa_3$ |
| $\kappa'_4$ | Conversion rate constant for $P$ to $S$ | $0.0007/s = 10^{-3} \times 0.7/s =: N_0^{-3} \kappa_4$ |

**2.1. Deriving the normalized system.** The first step of the multiscale approximation method is scaling reaction rate constants, species abundances, and time via a common scaling parameter ( $N_0$ ) to identify the timescale of each species. Here, we choose the value of the scaling parameter as  $N_0 = 10$  to transform the original reaction rate constants ( $\kappa'_i$ ) to the normalized constants ( $\kappa_i$ ) with  $\kappa'_i = N_0^{\beta_i} \kappa_i$ . The scaling exponents ( $\beta_i$ ) are chosen so that the normalized reaction rate constants ( $\kappa_i$ ) are of order 1 as presented in Table 2.

Similarly, the scaling exponents ( $\alpha_i$ ) are chosen so that  $X_i(t)/N_0^{\alpha_i}$  becomes of order 1. Since we are interested in the slow-scale dynamics of the system, we determine  $\alpha_i$  based on the steady state values of the ordinary differential equations, which are the large volume limit (i.e., thermodynamic limit) of the stochastic system [22, 43] (Figure 1(b)):

$$\alpha_S = 0, \alpha_E = 1, \alpha_C = 1, \alpha_P = 1.$$

Using these scaling exponents, we define the normalized species abundance on the times of order  $N_0^3$  as

$$(5) \quad Z_i^{N_0}(t) := \frac{X_i(tN_0^3)}{N_0^{\alpha_i}}$$

since we are interested in the dynamics at the timescale of order  $N_0^3$  (Figure 1(b)). Then, we derive the counting processes in terms of the normalized rate constants ( $\kappa_i$ ) and the normalized variables ( $Z_i^{N_0}(t)$ ) on the timescale of order  $N_0^3$ . For instance, the counting process for the first reaction becomes

$$(6) \quad \begin{aligned} Y_1 \left( \int_0^{N_0^3 t} \lambda'_1(X(s)) ds \right) &= Y_1 \left( \int_0^{N_0^3 t} \kappa'_1 X_S(s) X_E(s) ds \right) \\ &= Y_1 \left( \int_0^t (N_0^{-2} \kappa_1) Z_S^{N_0}(u) (N_0 Z_E^{N_0}(u)) N_0^3 du \right) \\ &=: Y_1 \left( \int_0^t N_0^2 \lambda_1(Z^{N_0}(u)) du \right), \end{aligned}$$

where  $Z^{N_0}$  is the vector whose  $i$ th component is  $Z_i^{N_0}$ . Here in the second equality, we apply the change of variable  $s = N_0^3 u$ , and in the third equality, we define a normalized propensity function as  $\lambda_1(Z^{N_0})(u) := \kappa_1 Z_S^{N_0}(u) Z_E^{N_0}(u)$ . In a similar way, we derive the counting processes for other reactions in terms of normalized propensity functions (see Table 3). Since  $\lambda_i(Z^{N_0})$  is of order 1, we can easily recognize the order of the counting processes in Table 3. The higher order indicates the faster counting process.

By substituting the counting processes in Table 3 into the original stochastic system (2), we obtain the normalized stochastic system for  $Z^{N_0}(t)$ . In this normalized system, we now replace the fixed scaling parameter value  $N_0$  with a varying

TABLE 3

Counting processes for the normalized system. Here, the scaling exponents,  $\alpha_S = 0, \alpha_E = 1, \alpha_C = 1, \alpha_P = 1$ , are used to derive the normalized species abundance  $Z_i^{N_0}$  as described in (5), and the scaling exponents,  $\beta_1 = -2, \beta_2 = -2, \beta_3 = -3, \beta_4 = -3$  are used to derive normalized reaction rates as described in Table 2.  $\lambda_i(Z^{N_0})$  are normalized propensity functions for  $i$ th reactions, which are order of 1, and thus the orders of reaction rates of  $R_1, R_2, R_3$ , and  $R_4$  are 2, 2, 1, and 1, respectively.

| Reaction                                 | Counting processes                                                                                         |
|------------------------------------------|------------------------------------------------------------------------------------------------------------|
| $S + E \xrightarrow{N_0^{-2}\kappa_1} C$ | $R_1^t(N_0^2\lambda_1(Z^{N_0})) := Y_1 \left( \int_0^t N_0^2\kappa_1 Z_S^{N_0}(u) Z_E^{N_0}(u) du \right)$ |
| $C \xrightarrow{N_0^{-2}\kappa_2} S + E$ | $R_2^t(N_0^2\lambda_2(Z^{N_0})) := Y_2 \left( \int_0^t N_0^2\kappa_2 Z_C^{N_0}(u) du \right)$              |
| $C \xrightarrow{N_0^{-3}\kappa_3} P + E$ | $R_3^t(N_0^1\lambda_3(Z^{N_0})) := Y_3 \left( \int_0^t N_0^1\kappa_3 Z_C^{N_0}(u) du \right)$              |
| $P \xrightarrow{N_0^{-3}\kappa_4} S$     | $R_4^t(N_0^1\lambda_4(Z^{N_0})) := Y_4 \left( \int_0^t N_0^1\kappa_4 Z_P^{N_0}(u) du \right)$              |

parameter  $N$  to derive a family of vector-valued processes  $\{Z^N(t)\}$  depending on the parameter  $N$ :

$$\begin{aligned}
 (7) \quad & Z_S^N(t) = Z_S^N(0) + R_2^t(N^2\lambda_2(Z^N)) + R_4^t(N\lambda_4(Z^N)) - R_1^t(N^2\lambda_1(Z^N)), \\
 & Z_E^N(t) = Z_E^N(0) + N^{-1}(R_2^t(N^2\lambda_2(Z^N)) + R_3^t(N\lambda_3(Z^N)) - R_1^t(N^2\lambda_1(Z^N))), \\
 & Z_C^N(t) = Z_C^N(0) + N^{-1}(R_1^t(N^2\lambda_1(Z^N)) - R_2^t(N^2\lambda_2(Z^N)) - R_3^t(N\lambda_3(Z^N))), \\
 & Z_P^N(t) = Z_P^N(0) + N^{-1}(R_3^t(N\lambda_3(Z^N)) - R_4^t(N\lambda_4(Z^N))).
 \end{aligned}$$

The initial conditions for the family of processes  $\{Z^N(t)\}$  are defined so that  $Z_i^N(0) \rightarrow Z_i^{N_0}(0)$  as  $N \rightarrow \infty$ :

$$\begin{aligned}
 (8) \quad & Z_S^N(0) = Z_S^{N_0}(0) = X_S(0), \\
 & Z_i^N(0) = \frac{1}{N} \lfloor NZ_i^{N_0}(0) \rfloor = \frac{1}{N} \left\lfloor \frac{N}{N_0} X_i(0) \right\rfloor, i = E, C, P.
 \end{aligned}$$

The floor function ( $\lfloor \cdot \rfloor$ ) is used so that the initial conditions of unnormalized species  $N^{\alpha_i} Z_i^N(0)$  have integer values (see [34] for details). In the following, we will find the limit of this family of processes as  $N \rightarrow \infty$  and use it to approximate the slow-scale dynamics of the stochastic system given in (2). Note that this approach is analogous to a singular perturbation approach based on Tikhonov's theorem [24, 37, 57], which reduces the multiscale *deterministic* systems by setting a small scaling parameter as 0 in the limit.

**2.2. Balance equations.** In the family of processes  $\{Z^N(t)\}$  given in (7), the order of the maximum production rates for species  $S$  is  $N^2$  due to the term  $R_2^t(N^2\lambda_2(Z^N))$  since  $\lambda_i(Z^N)$  is of order 1. The order of the maximum consumption rate is also  $N^2$  due to  $R_1^t(N^2\lambda_1(Z^N))$ . That is, both maximum production and consumption rates of species  $S$  have the same scaling exponents as 2. If the maximum exponent of the production rates is larger than that of the consumption rates, the normalized abundance of the species asymptotically goes to infinity as  $N \rightarrow \infty$ . In the opposite case, it asymptotically goes to zero in the limit. Thus, when the maximum exponents of production and consumption rates are equal, which is known as the "balance equation," the limit of normalized species can be nondegenerate [33]. In the case when there is a subset of species which do not satisfy the balance equations, their limit will be nondegenerate only for a certain time period, which gives the restriction

on the choice of the timescale (see [33, 34] for further details). In our example in (7), all species and their linear combinations satisfy the balance equations. We also show that a nondegenerate limit of  $\{Z^N(t)\}$  exists (see Appendix B for details).

**2.3. Deriving the average of fast variables and limiting model.** For the species  $P$  in (7), the maximum scaling exponent of the reaction rates and the scaling exponent of species abundance (i.e.,  $\alpha_P$ ) are all 1. This indicates that the number of molecules of  $P$  and its change by reactions are of the same order on the current timescale, and therefore the current slow timescale is a natural timescale for  $P$ . In other words,  $P$  is a slow species in terms of the singular perturbation theory [37]. For other species,  $\alpha_i$  is less than the maximum scaling exponents of their reaction rates. Hence, the abundance of these species would fluctuate rapidly by reactions on the current slow timescale, indicating that they are fast species. Due to the rapid fluctuation, these fast species do not have a functional limit. Instead, they are averaged out in the limit as  $N \rightarrow \infty$  [5, 34, 46]. We now describe how to derive the averaged values of fast species in the limit.

Using two conservation constraints of the systems (7),

$$(9) \quad Z_{S_T}^N := \frac{1}{N} Z_S^N(t) + Z_C^N(t) + Z_P^N(t) = \frac{1}{N} Z_S^N(0) + Z_C^N(0) + Z_P^N(0),$$

$$(10) \quad Z_{E_T}^N := Z_E^N(t) + Z_C^N(t) = Z_E^N(0) + Z_C^N(0),$$

we can simplify (7) as

$$(11) \quad Z_S^N(t) = Z_S^N(0) + R_2^t(N^2\kappa_2 Z_C^N) + R_4^t(N\kappa_4 Z_P^N) - R_1^t(N^2\kappa_1 Z_S^N Z_E^N),$$

$$(12) \quad Z_P^N(t) = Z_P^N(0) + N^{-1}R_3^t(N\kappa_3 Z_C^N) - N^{-1}R_4^t(N\kappa_4 Z_P^N).$$

Equations (11)–(12) are closed since  $Z_C^N(t)$  and  $Z_E^N(t)$  are determined by  $Z_S^N(t)$  and  $Z_P^N(t)$  from the conservations in (9)–(10) as follows:

$$(13) \quad Z_C^N(t) = Z_{S_T}^N - \frac{1}{N} Z_S^N(t) - Z_P^N(t),$$

$$(14) \quad Z_E^N(t) = Z_{E_T}^N - Z_C^N(t) = Z_{E_T}^N - Z_{S_T}^N + \frac{1}{N} Z_S^N(t) + Z_P^N(t).$$

Because the maximum order of the reaction rate ( $N^2$ ) in (11) is greater than  $N^{\alpha_S} = N^0$ , species  $S$  is rapidly fluctuating and thus its behavior in (12)–(13) is averaged out as  $N \rightarrow \infty$ . To derive the averaged value, we use the law of large numbers for the Poisson process:

$$(15) \quad \lim_{N \rightarrow \infty} \sup_{x \leq x_0} \left| \frac{Y(N^\alpha x)}{N^\alpha} - x \right| = 0,$$

where  $\alpha > 0, x_0 > 0$ , and  $Y$  is a unit Poisson process. From (15), it follows that

$$\frac{R_1^t(N^2\kappa_1 Z_S^N Z_E^N)}{N^2} = \frac{Y_1 \left( \int_0^t N^2\kappa_1 Z_S^N(u) (Z_{E_T}^N - Z_{S_T}^N + \frac{1}{N} Z_S^N(u) + Z_P^N(u)) du \right)}{N^2}$$

has the same limit as the following integral:

$$\int_0^t \kappa_1 Z_S^N(u) \left( Z_{E_T}^N - Z_{S_T}^N + \frac{1}{N} Z_S^N(u) + Z_P^N(u) \right) du.$$

Applying this result after dividing (11) by  $N^2$ , we get

$$\int_0^t \left( \kappa_2 Z_C^N(u) - \kappa_1 Z_S^N(u) \left( Z_{E_T}^N - Z_{S_T}^N + \frac{1}{N} Z_S^N(u) + Z_P^N(u) \right) \right) du \rightarrow 0$$

as  $N \rightarrow \infty$  since  $Z_S^N(t)/N^2$  and  $R_4^t(N\kappa_4 Z_P^N)/N^2$  go to zero. As  $Z_S^N(t)/N \rightarrow 0$  in the limit, we get

$$(16) \quad \int_0^t \left( \kappa_2 Z_C^N(u) - \kappa_1 Z_S^N(u) (Z_{E_T}^N - Z_{S_T}^N + Z_P^N(u)) \right) du \\ = \int_0^t \left( \kappa_2 (Z_{S_T}^N - Z_P^N(u)) - \kappa_1 Z_S^N(u) (Z_{E_T}^N - Z_{S_T}^N + Z_P^N(u)) \right) du \rightarrow 0.$$

Setting the integrand of (16) to zero in the limit and defining  $Z_P := \lim_{N \rightarrow \infty} Z_P^N$ , we can derive the averaged value of the fast species ( $\bar{Z}_S(t)$ ) in terms of the slow species ( $Z_P(t)$ ) in the limit (see Appendix A for the detailed derivation):

$$(17) \quad \bar{Z}_S(t) = \frac{\kappa_2 (Z_{S_T} - Z_P(t))}{\kappa_1 (Z_{E_T} - Z_{S_T} + Z_P(t))},$$

where

$$(18) \quad Z_{S_T} = \lim_{N \rightarrow \infty} Z_{S_T}^N = \frac{X_C(0)}{N_0} + \frac{X_P(0)}{N_0},$$

$$(19) \quad Z_{E_T} = \lim_{N \rightarrow \infty} Z_{E_T}^N = \frac{X_E(0)}{N_0} + \frac{X_C(0)}{N_0}.$$

Since  $\bar{Z}_S(s)/N \rightarrow 0$  as  $N \rightarrow \infty$ , the averaged value of another fast species ( $C$ ) in the limit is also derived from (13) as

$$(20) \quad \bar{Z}_C(s) = Z_{S_T} - Z_P(s).$$

Using this averaged value in the limit and the law of large numbers given in (15), we get the limiting equation of (12):

$$(21) \quad Z_P(t) = Z_P(0) + \int_0^t (\kappa_3 \bar{Z}_C(s) - \kappa_4 Z_P(s)) ds.$$

Note that this reduced system solely depends on  $Z_P$  since  $\bar{Z}_C(s)$  is determined by  $Z_P(s)$  from (20). Following the original multiscale approximation method [5, 34], we used  $Z_P(t)$  of the limiting model to approximate  $X_P(t)$  after unnormalizing the species abundance and rescaling back the time as

$$(22) \quad X_P(t) \approx N_0 Z_P(N_0^{-3}t).$$

The advantage of this approximation is that its error can be estimated using the law of large numbers and the martingale central limiting theorem [18, 35, 44, 45]. In our case, we get  $X_P(t) = N_0 Z_P(N_0^{-3}t) + O(N_0^{1/2})$  since it has been known that  $\frac{1}{N_0} X_P(N_0^3 t) - Z_P(t) = O(N_0^{-1/2})$  [35]. Note that  $X^N - Z^N = O(N^{-\beta})$  for some  $\beta > 0$  means that  $N^\beta(X^N(t) - Z^N(t)) \Rightarrow U(t)$  as  $N \rightarrow \infty$ , where  $U(t) = O(1)$  (stochastically bounded). Here,  $\Rightarrow$  indicates convergence in distribution (i.e., weak convergence).

However, the approximation (22) obtained from the deterministic limiting model (21) cannot capture the fluctuation of  $X_P(t)$ . One natural way to resolve this issue is to replace the deterministic reaction terms in (21) by random jump processes with the corresponding propensity functions, which leads to the following stochastic process:

$$(23) \quad \mathbb{Z}_P(t) = Z_P^{N_0}(0) + N_0^{-1}R_3^t(N_0\kappa_3\mathbb{Z}_C) - N_0^{-1}R_4^t(N_0\kappa_4\mathbb{Z}_P),$$

where

$$(24) \quad \mathbb{Z}_C(t) = Z_{S_T} - \mathbb{Z}_P(t).$$

Note that this stochastic equation is the same as the original one for  $Z_P^{N_0}$  in (12) except for  $\mathbb{Z}_C(t)$ , which now solely depends on the slow variable  $\mathbb{Z}_P(t)$  as  $\bar{Z}_C(s)$  does in (20). Similarly to (22), we can use  $\mathbb{Z}_P(t)$  in (23) to approximate  $X_P(t)$ , as  $X_P(t) \approx N_0\mathbb{Z}_P(N_0^{-3}t)$ .

In Appendix C, we show that

$$(25) \quad X_P(t) \approx N_0\mathbb{Z}_P(N_0^{-3}t) + \mathbb{E}(N_0^{-3}t),$$

$$(26) \quad \mathbb{E}(t) = \int_0^t \sqrt{\kappa_3 |X_S(0) - \bar{Z}_S(s) - \mathbb{E}(s)| + \kappa_4 |\mathbb{E}(s)|} dW(s) + \int_0^t \{ \kappa_3 (X_S(0) - \bar{Z}_S(s) - \mathbb{E}(s)) - \kappa_4 \mathbb{E}(s) \} ds,$$

where  $W$  is a standard Brownian motion. Importantly,  $X_P(t) = N_0\mathbb{Z}_P(N_0^{-3}t) + O(1)$  because  $\mathbb{E}(t) = O(1)$ , indicating that the new approximation with  $N_0\mathbb{Z}_P(N_0^{-3}t)$  is more accurate than the deterministic limit in (22). However, the new approximation with  $N_0\mathbb{Z}_P(N_0^{-3}t)$  still contains a considerable error, as illustrated in Figure 2(a). Consistent with our error analysis in (26), the numerically estimated errors also increase as  $|X_S(0) - \bar{Z}_S(s)|$  becomes larger considering the fact that  $\bar{Z}_S(s) \approx 2$  (Figure 2(b) and (c)).

The dependence of errors on  $|X_S(0) - \bar{Z}_S(s)|$  indicates that the error seen in Figure 2 mainly stems from neglecting the species  $S$  in the approximating process. Specifically, the initial condition of species  $S$ ,  $X_S(0)$ , is ignored in the limiting total

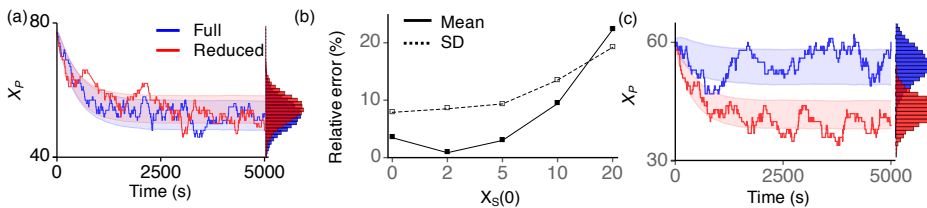

FIG. 2. The reduced model (23)–(24) does not accurately approximate the original model (2). (a) The simulated trajectories of the original full model,  $X_P(t)$ , and the reduced model,  $N_0\mathbb{Z}_P(N_0^{-3}t)$ . The colored ranges and histograms represent standard deviations of  $X_P(t)$  and  $N_0\mathbb{Z}_P(N_0^{-3}t)$  from their means and their distributions at the steady state, respectively. Here, the initial condition is the one used in Figure 1(b). In particular  $X_S(0) = 0$ . (b) The relative differences of means and standard deviations at the steady state ( $t = 5000s$ ) between the full model and the reduced model are numerically estimated for various values of  $X_S(0)$ . Here,  $X_C(0) = 0, X_E(0) = 40, X_P(0) = 80 - X_S(0)$ . (c) The simulated trajectories of the original full model,  $X_P(t)$ , and the reduced model,  $N_0\mathbb{Z}_P(N_0^{-3}t)$  when  $X_S(0) = 20$ . Due to the larger value of  $X_S(0)$ , the error becomes larger than (a).



conserved quantity ( $Z_{S_T}$ ) of (18) due to the fact that the scaling exponent of  $S$  ( $\alpha_S$ ) is smaller than other scaling exponents in the conservation constraint (9). For the same reason,  $\bar{Z}_S(s)$  is also neglected in the limit of the conservation constraint (20). Since  $\bar{Z}_C(s)$  in (20) is used to derive (24),  $S$  is also neglected in the reduced model (23)–(24). Therefore, as  $X_S(0)$  takes a larger portion of  $X_{S_T}$  in (3), ignoring  $X_S(0)$  in deriving  $Z_{S_T}$  causes a larger error, as seen in Figure 2(b) and (c).

Note that we used one scaling exponent for species abundance of  $S$  (i.e.,  $\alpha_S = 0$ ) for simplicity even when its order of magnitude of species abundance changes in time. In such a case,  $\alpha_S$  is supposed to be adjusted throughout time as suggested in the original multiscale approximation method [33, 34]. Specifically, when  $X_S(0) = O(N_0)$  as in the case of Figure 2(c), it is suggested to use  $\alpha_S = 1$  for the initial transient period and  $\alpha_S = 0$  in the later time. However, with such multiple choices of  $\alpha_S$  in time, the approximation process becomes complex since different reduced models will be derived in time and combining their numerical simulations is difficult.

**3. Modified multiscale stochastic approximation method.** In order to correct the approximate errors seen in Figure 2, we introduce a modified conservation law of the normalized variables:

$$(27) \quad \mathcal{Z}_{S_T}^N := \frac{1}{N_0} Z_S^N(t) + Z_C^N(t) + Z_P^N(t) = \frac{1}{N_0} Z_S^N(0) + Z_C^N(0) + Z_P^N(0).$$

Note that  $\frac{1}{N} Z_S^N(t)$  in (9) is replaced by  $\frac{1}{N_0} Z_S^N(t)$  to prevent approximating  $Z_S^N$  as 0 in the conservation law when  $N \rightarrow \infty$ . The limit of the newly derived total conserved quantity among the normalized species is

$$\mathcal{Z}_{S_T} := \lim_{N \rightarrow \infty} \mathcal{Z}_{S_T}^N = \frac{1}{N_0} (X_S(0) + X_C(0) + X_P(0)) = \frac{1}{N_0} X_{S_T}.$$

In contrast to  $Z_{S_T}$  in (18),  $\mathcal{Z}_{S_T}$  does not depend on the fraction of  $X_S(0)$  in  $X_S(0) + X_C(0) + X_P(0)$  as the total amount of the substrate,  $X_{S_T}$ , is fixed— $\mathcal{Z}_{S_T}$  is more natural conservation constant than  $Z_{S_T}$ . By substituting the new conservation constraint into (11)–(14), we define a new family of stochastic processes:

$$(28) \quad Z_S^N(t) = Z_S^N(0) + R_2^t (N^2 \kappa_2 Z_C^N) + R_4^t (N \kappa_4 Z_P^N) - R_1^t (N^2 \kappa_1 Z_S^N Z_E^N),$$

$$(29) \quad Z_P^N(t) = Z_P^N(0) + N^{-1} R_3^t (N \kappa_3 Z_C^N) - N^{-1} R_4^t (N \kappa_4 Z_P^N),$$

$$(30) \quad Z_C^N(t) = \mathcal{Z}_{S_T}^N - \frac{1}{N_0} Z_S^N(t) - Z_P^N(t),$$

$$(31) \quad Z_E^N(t) = Z_{E_T}^N - Z_C^N(t) = Z_{E_T}^N - \mathcal{Z}_{S_T}^N + \frac{1}{N_0} Z_S^N(t) + Z_P^N(t).$$

Though this new family of processes is different from the one in (11)–(14), we will use the same notation ( $Z_i^N(t)$ ) for simplicity. Since (28)–(31) is equivalent to the original normalized system in (7) when  $N = N_0$ , the new family of processes includes the original system. Thus, the limiting model of (28)–(31) can be used to approximate the original system. To derive the limiting model, we divide (28) by  $N^2$  and let  $N \rightarrow \infty$  to get  $\int_0^t (\kappa_2 Z_C^N(s) + \frac{1}{N} \kappa_4 Z_P^N(s) - \kappa_1 Z_S^N(s) Z_E^N(s)) ds \rightarrow 0$  in the same way as described in the previous section. As  $\frac{1}{N} \kappa_4 Z_P^N(s) \rightarrow 0$ , we get  $\int_0^t (\kappa_2 Z_C^N(s) - \kappa_1 Z_S^N(s) Z_E^N(s)) ds \rightarrow 0$ . Substituting (30)–(31) in the equation, we get

$$(32) \quad \int_0^t (\kappa_2 Z_C^N(s) - \kappa_1 N_0 (Z_{S_T}^N - Z_C^N(s) - Z_P^N(s)) (Z_{E_T}^N - Z_C^N(s))) ds \rightarrow 0$$

as  $N \rightarrow \infty$ . Setting the integrand to zero in the limit, we get the following approximation of the averaged value of fast species ( $\bar{Z}_C$ ) with respect to the slow species  $Z_P := \lim_{N \rightarrow \infty} Z_P^N$ :

$$(33) \quad \bar{Z}_C(s) \approx \frac{Z_{E_T} + Z_{S_T} - Z_P(s) + \frac{K_d}{N_0}}{2} - \frac{\sqrt{\left(Z_{E_T} + Z_{S_T} - Z_P(s) + \frac{K_d}{N_0}\right)^2 - 4Z_{E_T}(Z_{S_T} - Z_P(s))}}{2},$$

where  $K_d = \frac{\kappa_2}{\kappa_1}$  (see Appendix A for a detailed derivation). Using (33) and the law of large numbers in (15), and letting  $N \rightarrow \infty$  in (29), we get a limiting model for the slow species  $P$ :

$$(34) \quad Z_P(t) \approx Z_P(0) + \int_0^t (\kappa_3 \bar{Z}_C(s) - \kappa_4 Z_P(s)) ds.$$

We convert this deterministic limiting model to the stochastic process as in the previous section:

$$(35) \quad Z_P(t) = Z_P^{N_0}(0) + N_0^{-1} R_3^t (N_0 \kappa_3 Z_C) - N_0^{-1} R_4^t (N_0 \kappa_4 Z_P),$$

where

$$(36) \quad Z_C(t) = \frac{Z_{E_T} + Z_{S_T} - Z_P(t) + \frac{K_d}{N_0}}{2} - \frac{\sqrt{\left(Z_{E_T} + Z_{S_T} - Z_P(t) + \frac{K_d}{N_0}\right)^2 - 4Z_{E_T}(Z_{S_T} - Z_P(t))}}{2}.$$

Note that in this new approximation,  $Z_C(t)$  is determined by  $Z_P(t)$  differently from the previous approximation in (23)–(24). We again use  $N_0 Z_P(N_0^{-3}t)$  to approximate  $X_P(t)$  of the original model, which is accurate as seen in Figure 3(a). Furthermore, the new approximation is accurate regardless of the initial condition of  $S$  (Figure 3(b) and (c)) in contrast to the previous approximation (Figure 2).

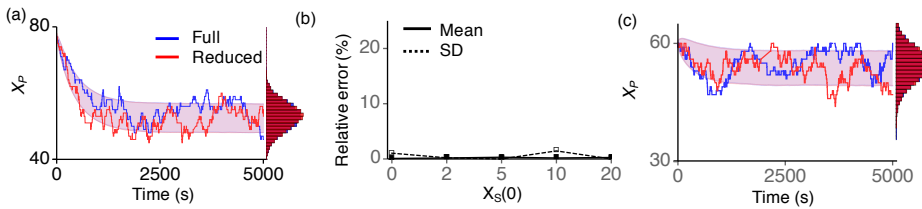

FIG. 3. The reduced model (35) accurately approximates the original model (2). (a) The simulated trajectories of the original full model,  $X_P(t)$ , and the reduced model,  $N_0 Z_P(N_0^{-3}t)$ . The colored ranges and histograms represent the standard deviations of  $X_P(t)$  and  $N_0 Z_P(N_0^{-3}t)$  from their means and their distributions at the steady state, respectively. The initial condition used in (a) is the same as the one used in Figure 2(a). In particular,  $X_S(0) = 0$ . (b) The relative differences of means and standard deviations at the steady state ( $t = 5000s$ ) between the full model and the reduced model are numerically estimated for various  $X_S(0)$ . (c) The simulated trajectories of the original full model,  $X_P(t)$ , and the reduced model,  $N_0 Z_P(N_0^{-3}t)$ , when  $X_S(0) = 20$ .

To investigate the accuracy of the new approximation, we perform the error analysis and obtain the following:

$$(37) \quad X_P(t) \approx N_0 \mathcal{Z}_P(N_0^{-3}t) + \mathcal{E}(N_0^{-3}t),$$

$$(38) \quad \mathcal{E}(t) = \int_0^t \sqrt{(\kappa_3 + \kappa_4) |\mathcal{E}(s)|} dW(s) - \int_0^t (\kappa_3 + \kappa_4) \mathcal{E}(s) ds,$$

where  $W$  is a standard Brownian motion (see Appendix D for detailed analysis). In particular, since  $\mathcal{E}(0) = 0$  and the diffusion and drift terms are proportional to  $\mathcal{E}(s)$ , it follows that  $\mathcal{E}(t) = 0$  and thus  $X_P(t) = N_0 \mathcal{Z}_P(N_0^{-3}t) + o(1)$ , which shows the accuracy of the newly reduced model in (35)–(36). Note that  $X^N = Z^N + o(N^{-\beta})$  for some  $\beta > 0$  means that  $N^\beta (X^N(t) - Z^N(t)) \Rightarrow 0$  as  $N \rightarrow \infty$ , where  $\Rightarrow$  indicates convergence in distribution (i.e., weak convergence).

**4. Multiscale approximation for a genetic oscillatory system.** In the previous section, we propose a modified multiscale approximation method that leads to an accurate approximation for the stochastic system with a single steady state. In this section, we apply the same idea to the transcriptional negative feedback loop system, which generates oscillations (Figure 4(a)) [38, 39, 40, 42]. This system consists of nine reactions as described in Table 4: the transcription of mRNA ( $M$ ) occurs proportional to active DNA ( $D_A$ ) and then  $M$  is translated into protein ( $P$ ), which promotes the production of the repressor ( $R$ ). The repressor reversibly binds with  $D_A$  to form repressed DNA complex ( $D_R$ ). Furthermore,  $M$ ,  $P$ , and  $R$  degrade. This model is described with the following set of stochastic equations:

$$(39) \quad \begin{aligned} X_M(t) &= X_M(0) + R_1^t(\lambda'_1(X)) - R_2^t(\lambda'_2(X)), \\ X_P(t) &= X_P(0) + R_3^t(\lambda'_3(X)) - R_4^t(\lambda'_4(X)), \\ X_R(t) &= X_R(0) + R_5^t(\lambda'_5(X)) - R_6^t(\lambda'_6(X)) - R_8^t(\lambda'_8(X)) + R_9^t(\lambda'_9(X)), \\ X_{D_R}(t) &= X_{D_R}(0) + R_8^t(\lambda'_8(X)) - R_9^t(\lambda'_9(X)) - R_7^t(\lambda'_7(X)), \\ X_{D_A}(t) &= X_{D_A}(0) - R_8^t(\lambda'_8(X)) + R_9^t(\lambda'_9(X)) + R_7^t(\lambda'_7(X)). \end{aligned}$$

Note that the total number of DNA ( $X_{D_T}$ ) is conserved:

$$(40) \quad X_{D_T} := X_{D_A}(t) + X_{D_R}(t) = X_{D_A}(0) + X_{D_R}(0).$$

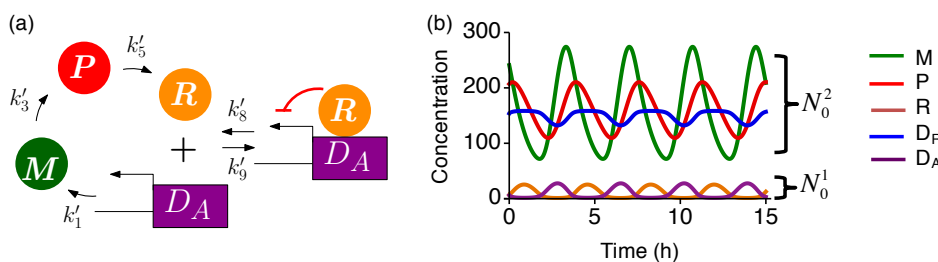

FIG. 4. *Transcriptional negative feedback loop.* (a) The diagram of the biochemical reaction network. (b) The simulations of ordinary differential equations, which are the large volume limit of the stochastic system (39). When converting stochastic propensity functions to macroscopic reaction rates, volume  $V = 1/nM$  is assumed. Here,  $M(0) = 180nM$ ,  $P(0) = 210nM$ ,  $R(0) = 20nM$ ,  $D_R(0) = 160nM$ , and  $D_A(0) = 0nM$ . For  $N_0 = 10$ , the scaling exponents ( $\alpha_i$ ) for species abundance become 1 for  $R$  and  $D_A$  and 2 for others.

TABLE 4

Reactions and propensity functions. The 7th reaction describes the degradation of R bound to DNA.  $\kappa'_1 = 15.1745/\text{hr}$ ,  $\kappa'_8 = 200/\text{hr}$ ,  $\kappa'_9 = 50/\text{hr}$ , and other  $\kappa'_i$  are  $1/\text{hr}$ , which are adopted from [40]. Thus, for  $N_0 = 10$ ,  $\kappa'_1 = N_0^1 \kappa_1$ ,  $\kappa'_i = N_0^2 \kappa_i$  for  $i = 8$  and  $9$ , and  $\kappa'_i = N_0^0 \kappa_i$  for others so that  $\kappa_i$  are of order 1. The scaling exponents ( $\alpha_i$ ), 1 for R and  $D_A$ , and 2 for others are used to derive normalized species  $Z_i^{N_0}$ , which are of order 1. Hence, the normalized propensity functions ( $\lambda_i(Z^{N_0})$ ) are of order 1, and the orders of reaction rates can be easily derived from  $\lambda'_i(Z^{N_0})/\lambda_i(Z^{N_0})$ .

| Reactions                             | Original & normalized propensity functions                                                                    |
|---------------------------------------|---------------------------------------------------------------------------------------------------------------|
| $D_A \xrightarrow{\kappa'_1} D_A + M$ | $\lambda'_1(X) := \kappa'_1 X_{D_A} = N_0^2 \kappa_1 Z_{D_A}^{N_0} =: N_0^2 \lambda_1(Z^{N_0})$               |
| $M \xrightarrow{\kappa'_2} \phi$      | $\lambda'_2(X) := \kappa'_2 X_M = N_0^2 \kappa_2 Z_M^{N_0} =: N_0^2 \lambda_2(Z^{N_0})$                       |
| $M \xrightarrow{\kappa'_3} M + P$     | $\lambda'_3(X) := \kappa'_3 X_M = N_0^2 \kappa_3 Z_M^{N_0} =: N_0^2 \lambda_3(Z^{N_0})$                       |
| $P \xrightarrow{\kappa'_4} \phi$      | $\lambda'_4(X) := \kappa'_4 X_P = N_0^2 \kappa_4 Z_P^{N_0} =: N_0^2 \lambda_4(Z^{N_0})$                       |
| $P \xrightarrow{\kappa'_5} P + R$     | $\lambda'_5(X) := \kappa'_5 X_P = N_0^2 \kappa_5 Z_P^{N_0} =: N_0^2 \lambda_5(Z^{N_0})$                       |
| $R \xrightarrow{\kappa'_6} \phi$      | $\lambda'_6(X) := \kappa'_6 X_R = N_0^1 \kappa_6 Z_R^{N_0} =: N_0^1 \lambda_6(Z^{N_0})$                       |
| $D_R \xrightarrow{\kappa'_7} D_A$     | $\lambda'_7(X) := \kappa'_7 X_{D_R} = N_0^2 \kappa_7 Z_{D_R}^{N_0} =: N_0^2 \lambda_7(Z^{N_0})$               |
| $D_A + R \xrightarrow{\kappa'_8} D_R$ | $\lambda'_8(X) := \kappa'_8 X_{D_A} X_R = N_0^4 \kappa_8 Z_{D_A}^{N_0} Z_R^{N_0} =: N_0^4 \lambda_8(Z^{N_0})$ |
| $D_R \xrightarrow{\kappa'_9} D_A + R$ | $\lambda'_9(X) := \kappa'_9 X_{D_R} = N_0^4 \kappa_9 Z_{D_R}^{N_0} =: N_0^4 \lambda_9(Z^{N_0})$               |

To derive the normalized system of (39), we scaled reaction rate constants with  $N_0 = 10$ :  $\kappa'_1 = N_0^1 \kappa_1$ ,  $\kappa'_i = N_0^2 \kappa_i$  for  $i = 8$  and  $9$  and  $\kappa'_i = N_0^0 \kappa_i$  for others, as seen in Table 4. According to the simulations of the deterministic system, which is the large volume limit of (39), the scaling exponents of the molecular abundance ( $\alpha_i$ ) can be chosen as 1 for  $X_{D_A}$  and  $X_R$  and 2 for other species (Figure 4(b)). Using  $\alpha_i$ , we define the normalized species abundance at the times of order  $N_0^0$  as  $Z_i^{N_0}(t) := X_i(t)/N_0^{\alpha_i}$ .

Using the normalized species ( $Z_i^{N_0}(t)$ ) and the normalized reaction rate constants ( $\kappa_i$ ), we derive the normalized propensity functions ( $\lambda_i(Z^{N_0})$ ), which are of order 1 as described in Table 4. After replacing the original propensity functions in (39) by the normalized ones, we replace  $N_0$  with  $N$  and obtain a family of vector-valued processes  $\{Z^N(t)\}$  satisfying

$$\begin{aligned} Z_M^N(t) &= Z_M^N(0) + N^{-2}(R_1^t(N^2 \lambda_1(Z^N)) - R_2^t(N^2 \lambda_2(Z^N))), \\ Z_P^N(t) &= Z_P^N(0) + N^{-2}(R_3^t(N^2 \lambda_3(Z^N)) - R_4^t(N^2 \lambda_4(Z^N))), \\ Z_R^N(t) &= Z_R^N(0) + N^{-1}(R_5^t(N^2 \lambda_5(Z^N)) - R_6^t(N \lambda_6(Z^N)) - R_8^t(N^4 \lambda_8(Z^N)) \\ &\quad + R_9^t(N^4 \lambda_9(Z^N))), \\ Z_{D_R}^N(t) &= Z_{D_R}^N(0) + N^{-2}(R_8^t(N^4 \lambda_8(Z^N)) - R_9^t(N^4 \lambda_9(Z^N)) - R_7^t(N^2 \lambda_7(Z^N))), \\ Z_{D_A}^N(t) &= Z_{D_A}^N(0) + N^{-1}(-R_8^t(N^4 \lambda_8(Z^N)) + R_9^t(N^4 \lambda_9(Z^N)) + R_7^t(N^2 \lambda_7(Z^N))). \end{aligned}$$

Initial conditions ( $Z_i^N(0)$ ) are defined as done in the previous section (8). For all species, the exponents of the maximum production and consumption rates are the same (i.e., balance equations are satisfied), justifying our choice of the timescale. Note that in the above system the normalized total DNA,  $Z_{D_A}^N(t)/N + Z_{D_R}^N(t)$ , is conserved. In the limit of this conserved relation,  $Z_{D_A}^N(t)/N$  will be neglected, and thus all DNA is under repressed status in the limit. Thus, the reduced model with the original multiscale approximation method reaches the steady state rather than oscillates. This example again indicates that the limiting model derived using the original method does not accurately approximate the full model when the system has

a conservation among species with disparate scales of molecular abundances. Thus, the modified conservation constraint as described in section 3 is used as

$$Z_{D_T}^N := Z_{D_A}^N(t)/N_0 + Z_{D_R}^N(t) = Z_{D_A}^N(0)/N_0 + Z_{D_R}^N(0),$$

and the limit of  $Z_{D_T}^N$  as  $N \rightarrow \infty$  is defined as

$$Z_{D_T} := \lim_{N \rightarrow \infty} Z_{D_T}^N = X_{D_A}(0)/N_0^2 + X_{D_R}(0)/N_0^2 = X_{D_T}/N_0^2.$$

Using this modified conservation constraint, we define a new family of stochastic processes, using the same notation  $(Z_i^N(t))$  for simplicity:

$$(41) \quad Z_M^N(t) = Z_M^N(0) + N^{-2}(R_1^t(N^2\lambda_1(Z^N)) - R_2^t(N^2\lambda_2(Z^N))),$$

$$(42) \quad Z_P^N(t) = Z_P^N(0) + N^{-2}(R_3^t(N^2\lambda_3(Z^N)) - R_4^t(N^2\lambda_4(Z^N))),$$

$$(43) \quad Z_R^N(t) = Z_R^N(0) + N^{-1}(R_5^t(N^2\lambda_5(Z^N)) - R_6^t(N\lambda_6(Z^N)) - R_8^t(N^4\lambda_8(Z^N)) + R_9^t(N^4\lambda_9(Z^N))),$$

$$(44) \quad Z_{D_R}^N(t) = Z_{D_R}^N(0) + N^{-2}(R_8^t(N^4\lambda_8(Z^N)) - R_9^t(N^4\lambda_9(Z^N)) - R_7^t(N^2\lambda_7(Z^N))),$$

$$(45) \quad Z_{D_A}^N(t) = N_0(Z_{D_T}^N - Z_{D_R}^N(t)).$$

Because the maximum scaling exponents of the reaction rates of species  $R$  and  $D_R$  are greater than the scaling exponents of molecular abundance  $(\alpha_i)$ ,  $R$  and  $D_R$  fluctuate rapidly and are averaged out. To derive the averaged values of these fast variables, we divide (44) by  $N^2$  and use the law of large numbers for Poisson process in (15) to get

$$(46) \quad \int_0^t (\kappa_8 Z_{D_A}^N(u) Z_R^N(u) - \kappa_9 Z_{D_R}^N(u)) du \\ = \int_0^t (\kappa_8 N_0 (Z_{D_T}^N - Z_{D_R}^N(u)) Z_R^N(u) - \kappa_9 Z_{D_R}^N(u)) du \rightarrow 0$$

as  $N \rightarrow \infty$ . Note that (46) consists of only the fast variables  $Z_R$  and  $Z_{D_R}$ , and thus we cannot use (46) to derive the limiting average of the fast variables with respect to the slow variables. To circumvent this problem, we introduce the auxiliary species  $T = R + D_R$ , as suggested by the original multiscale approximation method [33, 34]. Since the abundance of  $T$  has the same order as  $D_R$ , we get

$$(47) \quad Z_T^N(t) := (X_R(t) + X_{D_R}(t))/N^2 = N^{-1}Z_R^N(t) + Z_{D_R}^N(t),$$

so that  $Z_T^N(t)$  is of order 1. We now derive the equation for  $Z_T^N(t)$  using (43)–(44):

$$(48) \quad Z_T^N(t) = Z_T^N(0) + N^{-2}(R_5^t(N^2\lambda_5(Z^N)) - R_{10}^t(N^2\lambda_{10}(Z^N))), \\ R_{10}(N^2\lambda_{10}(Z^N)) := Y_6 \left( \int_0^t N\kappa_6 Z_R^N(u) du \right) + Y_7 \left( \int_0^t N^2\kappa_7 Z_{D_R}^N(u) du \right) \\ \equiv Y_{10} \left( \int_0^t (N\kappa_6 Z_R^N(u) + N^2\kappa_7 Z_{D_R}^N(u)) du \right) \\ = Y_{10} \left( \int_0^t N^2\kappa_{10} Z_T^N(u) du \right).$$

Note that  $\kappa_6 = \kappa_7 = 1$  is used to define  $\kappa_{10} := \kappa_6 = \kappa_7$ , and thus two reaction terms can be combined using the superposition principle of Poisson processes [15]. The process for  $Z_T^N(t)$  satisfies the balance equation, and  $Z_T^N(t)$  is a slow variable because

the maximum scaling exponent of the reaction rates and the scaling exponent for the species abundance are equal as 2. We substitute (47) into (46) and get

$$(49) \quad \int_0^t (\kappa_8 N_0 (Z_{D_T}^N - Z_{D_R}^N(u)) N(Z_T^N(u) - Z_{D_R}^N(u)) - \kappa_9 Z_{D_R}^N(u)) du \rightarrow 0$$

as  $N \rightarrow \infty$ . Setting the integrand to zero in the limit, we derive the averaged value of the fast species ( $\bar{Z}_{D_R}$ ) in terms of the slow species in the limit ( $Z_T(t) := \lim_{N \rightarrow \infty} Z_T^N(t)$ ):

$$(50) \quad \bar{Z}_{D_R}(t) = Z_T(t),$$

which is equivalent to the limit of (47). Equation (50) with (45) yields the averaged value of the fast species ( $\bar{Z}_{D_A}$ )

$$(51) \quad \bar{Z}_{D_A}(t) = N_0(Z_{D_T} - Z_T(t)).$$

Using  $\bar{Z}_{D_A}(t)$  and the law of large number for the Poisson process, we get the limiting model for the slow species. Because the limiting model is deterministic, we convert it to the stochastic system similarly as we did in the previous section:

$$(52) \quad \mathbb{Z}_M(t) = Z_M^{N_0}(0) + N_0^{-2} (R_1^t(N_0^2 \kappa_1 \bar{Z}_{D_A}) - R_2^t(N_0^2 \kappa_2 \mathbb{Z}_M)),$$

$$(53) \quad \mathbb{Z}_P(t) = Z_P^{N_0}(0) + N_0^{-2} (R_3^t(N_0^2 \kappa_3 \mathbb{Z}_M) - R_4^t(N_0^2 \kappa_4 \mathbb{Z}_P)),$$

$$(54) \quad \mathbb{Z}_T(t) = Z_T^{N_0}(0) + N_0^{-2} (R_5^t(N_0^2 \kappa_5 \mathbb{Z}_P) - R_{10}^t(N_0^2 \kappa_{10} \mathbb{Z}_T)),$$

$$(55) \quad \bar{\mathbb{Z}}_{D_A}(t) = N_0(Z_{D_T} - \mathbb{Z}_T(t)).$$

Note that  $\bar{\mathbb{Z}}_{D_A}(t)$  is derived from (51). In Figure 5, we used  $\mathbb{Z}_M(t)$  to approximate  $X_M(t)$  as  $X_M(t) \approx N_0^2 \mathbb{Z}_M(t)$ , but as seen from the plots, this approximation is inaccurate. In particular, the reduced model does not generate oscillations with a specific frequency in contrast to the full model (Figure 5(b))

We wondered whether the inaccuracy of the reduced model (52)–(55) stems from the fact that we simply fixed scaling exponents ( $\alpha_i = 1$ ) for  $R$  and  $D_A$  throughout the oscillation as they change between  $N_0^0$  and  $N_0$  (Figure 4). That is, as  $\alpha_i$  of  $R$

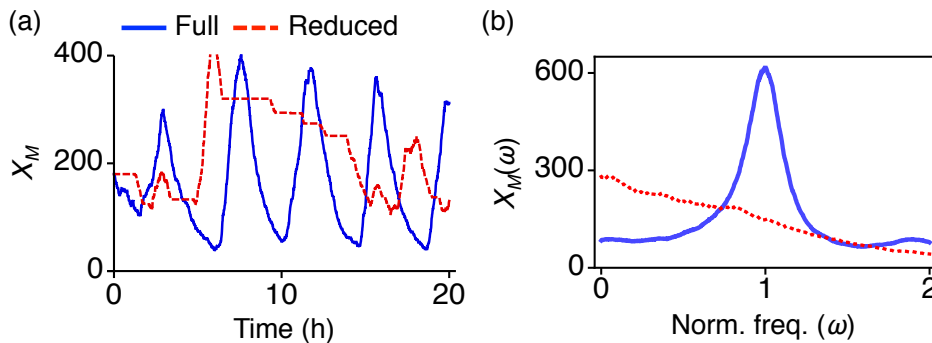

FIG. 5. The reduced model (52)–(55) does not accurately approximate the original full model (39). (a) The simulated trajectories of the original full model,  $X_M(t)$ , and the reduced model,  $N_0^2 \mathbb{Z}_M(t)$ . The initial condition is the one used in Figure 4(b). (b) Fourier transforms of stochastic trajectories with  $10^4$  cycles of the full and reduced models show a large difference.

and  $D_A$  change throughout the oscillation, it might not be appropriate to fix the order of  $\lambda'_8 = \kappa'_8 X_{D_A} X_R$  as  $N_0^4$  in Table 4, which is used to derive the equation for the average of fast species (49). However, we find that although the orders of  $X_{D_A}$  and  $X_R$  change,  $\kappa'_8 X_{D_A} X_R = O(N_0^4)$  throughout the oscillation. Thus our choice of fixed scaling exponents ( $\alpha_i$ ) for  $R$  and  $D_A$  is not the reason for the inaccuracy of the average of fast species (50) and thus the reduced model seen in Figure 5.

Instead, we find that the inaccurate approximation of the averaged value of the fast species in (55) is due to the fact that the slow auxiliary species ( $T$ ) consists of fast species with disparate abundance scales and thus a fast species ( $R$ ) with low scale of abundance is neglected in the limit. Specifically,  $\bar{Z}_{D_R}(t) = Z_T(t)$  in (50) is equivalent to approximating  $N^{-1}Z_R^N(t)$  by 0 in  $Z_T^N(t) = Z_{D_R}^N(t) + N^{-1}Z_R^N(t)$  as  $N \rightarrow \infty$ . Since  $\bar{Z}_{D_R}(t) = Z_T(t)$  is used to derive  $\bar{Z}_{D_A}(t)$  in (51) and hence  $\mathcal{Z}_{D_A}(t)$  in (55),  $R$  is also neglected in the reduced system given in (52)–(55), which leads to apparent errors seen in (Figure 5).

To resolve this problem, we adopt an idea similar to the one used in the previous section because a slow variable,  $Z_T^N(t)$ , is considered as a constant on a fast timescale and thus (47) can be considered as a conservation law on a fast timescale. We redefine  $Z_T^N$  as

$$(56) \quad Z_T^N(t) := Z_{D_R}^N(t) + N_0^{-1}Z_R^N(t),$$

which prevents the elimination of  $Z_R^N$  as  $N \rightarrow \infty$ . Though (56) is different from (47), we keep using the notation  $Z_T^N(t)$  for simplicity. With this new definition, we get the modified relation of (49):

$$(57) \quad \int_0^t (\kappa_8 N_0 (Z_{D_T}^N - Z_{D_R}^N(u)) N_0 (Z_T^N(u) - Z_{D_R}^N(u)) - \kappa_9 Z_{D_R}^N(u)) du \rightarrow 0$$

as  $N \rightarrow \infty$ . Setting the integrand to zero in the limit, we get the approximation for the averaged limiting value of  $Z_{D_R}$  as

$$\bar{Z}_{D_R}(t) \approx \frac{Z_{D_T} + \frac{K_d}{N_0^2} + Z_T(t) - \sqrt{(\frac{K_d}{N_0^2} - Z_{D_T} + Z_T(t))^2 + 4Z_{D_T} \frac{K_d}{N_0^2}}}{2},$$

where  $K_d = \kappa_9/\kappa_8$ . Using (45), we get

$$\bar{Z}_{D_A}(t) \approx N_0 \frac{Z_{D_T} - \frac{K_d}{N_0^2} - Z_T(t) + \sqrt{(\frac{K_d}{N_0^2} - Z_{D_T} + Z_T(t))^2 + 4Z_{D_T} \frac{K_d}{N_0^2}}}{2}.$$

By using the approximate averaged value ( $\bar{Z}_{D_A}$ ) and the law of large numbers, we obtain the modified limiting model for the slow species. Since the limiting model is deterministic, as before, we convert it to the following stochastic system:

$$(58) \quad \mathcal{Z}_M(t) = Z_M^{N_0}(0) + N_0^{-2} (R_1^t(N_0^2 \kappa_1 \bar{Z}_{D_A}) - R_2^t(N_0^2 \kappa_2 \mathcal{Z}_M)),$$

$$(59) \quad \mathcal{Z}_P(t) = Z_P^{N_0}(0) + N_0^{-2} (R_3^t(N_0^2 \kappa_3 \mathcal{Z}_M) - R_4^t(N_0^2 \kappa_4 \mathcal{Z}_P)),$$

$$(60) \quad \mathcal{Z}_T(t) = Z_T^{N_0}(0) + N_0^{-2} (R_5^t(N_0^2 \kappa_5 \mathcal{Z}_P) - R_{10}^t(N_0^2 \kappa_{10} \mathcal{Z}_T)),$$

$$(61) \quad \bar{\mathcal{Z}}_{D_A}(t) = N_0 \frac{Z_{D_T} - \frac{K_d}{N_0^2} - \mathcal{Z}_T(t) + \sqrt{(\frac{K_d}{N_0^2} - Z_{D_T} + \mathcal{Z}_T(t))^2 - 4Z_{D_T} \frac{K_d}{N_0^2}}}{2}.$$

Note that this newly derived reduced system is the same as the one in (52)–(55) except for (61). We used  $\mathcal{Z}_M(t)$  to approximate  $X_M(t)$  as  $X_M(t) \approx N_0^2 \mathcal{Z}_M(t)$ . As

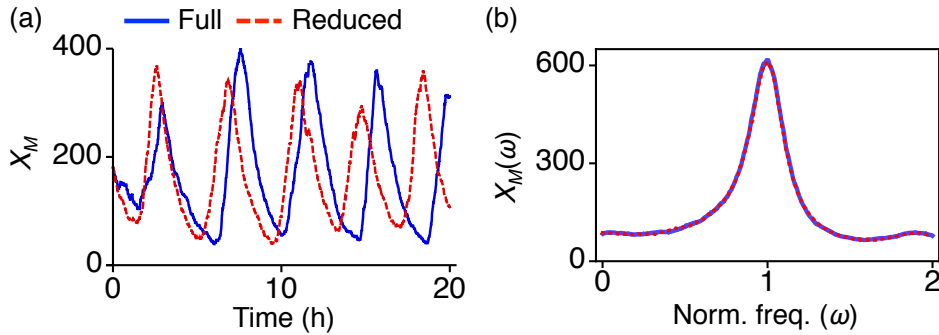

FIG. 6. The reduced model (58)–(61) accurately approximates the original full model (39). (a) The simulated trajectories of the original full model,  $X_M(t)$ , and the reduced model,  $N_0^2 \mathcal{Z}_M(t)$ . The initial condition is the one used in Figure 4(b). (b) Fourier transforms of stochastic trajectories with  $10^4$  cycles of the full and reduced models are consistent.

seen from the simulation (Figure 6), the reduced model accurately approximates the original full model.

We can often obtain slow auxiliary variables by combining fast variables because fast reactions could cancel each other, as seen in (48). These newly derived slow variables play a critical role in deriving the reduced models in the multiscale stochastic approximation method [11, 16, 34]. If the slow normalized auxiliary species are derived as proposed in the original method (47), the constituent fast species of the auxiliary species are ignored in the limit if their scales of abundances ( $\alpha_i$ ) are smaller than those of other constituent fast species. This leads to considerable errors, as seen in Figure 5. On the other hand, our modification of the auxiliary variables given in (56) prevents the fast species with small abundance being neglected in the limit and leads to more accurate approximation as shown in Figure 6.

**5. Conclusion.** Cells consist of diverse species whose abundances are on disparate scales. For instance, the concentrations of metabolites vary more than  $10^6$  fold in *E. coli*: the concentration of glutamate and adenosine are about  $10^2 \mu M$  and  $10^{-4} \mu M$ , respectively [7]. Thus, biochemical reaction networks often have conservation laws involving species with disparate abundance scales. Furthermore, the combination of fast species with disparate abundance scales can also form virtual slow auxiliary species that evolve slowly due to the cancellation of the fast reactions. In such cases, with the original multiscale approximation method, the constituent species with the low abundance are ignored in the conservation constraint or in the auxiliary species of limiting models as shown in (18) or (50). Therefore, the original multiscale approximation method [5, 34] can lead to potential errors in the limiting models, as seen in our examples (Figures 2 and 5). To address this problem, we proposed here to replace the scaling parameter  $N$  by the fixed value  $N_0$  in the conservation constraints and auxiliary variables as we did in (27) and (56). Using these modified conservation constraints (or auxiliary variables), we redefined the family of the normalized stochastic processes in such a way that its limit provides accurate approximations for the full stochastic systems of the Michaelis–Menten kinetics (Figure 3) and the genetic oscillator (Figure 6). This indicates that our modified method is applicable for a broader class of multiscale stochastic biochemical reaction networks than the original method.



When the abundance of species evolves across multiple scales over time, the original multiscale approximation method may require time-dependent scaling exponent  $\alpha_i$  and thus lead to different reduced models over time [33]. In this case, the approximation process becomes complex as it requires combining different reduced models over time. On the other hand, our modified multiscale approximation method using the fixed  $\alpha_i$  produces an accurate approximation in our example although some species abundances change over time (Figure 3(c)). It would be interesting future work to examine whether our modified method is applicable to general systems where the scales of species abundance change over time.

Interestingly, the reduced models obtained using our methods coincide with those derived with the stochastic total QSSA approach [6, 40, 41, 49]. Therefore, the error analysis used in our work also can be applied to validate the accuracy of the stochastic total QSSA, which has been until now investigated mostly numerically. Another interesting application of our work can be the extension of our method to approximate stochastic reaction-diffusion systems [17, 30, 31, 36, 52].

**Appendix A. Derivation of the spatial averages of fast species in sections 2 and 3.** From the original full model described in (11)–(12), we derive a scaled generator of  $z = (z_S, z_P)$  as

$$(62) \quad \begin{aligned} A_N f(z) = & N^2 \kappa_1 \left( Z_{E_T}^N - Z_{S_T}^N + \frac{1}{N} z_S + z_P \right) z_S [f(z - e_S) - f(z)] \\ & + N^2 \kappa_2 \left( Z_{S_T}^N - \frac{1}{N} z_S - z_P \right) [f(z + e_S) - f(z)] \\ & + N \kappa_3 \left( Z_{S_T}^N - \frac{1}{N} z_S - z_P \right) \left[ f\left(z + \frac{1}{N} e_P\right) - f(z) \right] \\ & + N \kappa_4 z_P \left[ f\left(z + e_S - \frac{1}{N} e_P\right) - f(z) \right]. \end{aligned}$$

Define an occupational random measure of  $Z_S^N$  as

$$\Gamma^N(D \times [0, t]) = \int_0^t 1_D(Z_S^N(s)) ds$$

in the space of measures  $\nu$  on  $\mathbb{Z}^+ \times [0, \infty)$  such that  $\nu(\mathbb{Z}^+ \times [0, t]) = t$  and  $\mathbb{Z}^+$  is the set of natural numbers and zero. Denote the space of measures as  $\mathcal{L} \equiv \mathcal{L}(\mathbb{Z}^+)$ .

Setting  $f(z) = z_S$  in (62), we define a martingale

$$(63) \quad \begin{aligned} M^N(t) = & Z_S^N(t) - Z_S^N(0) \\ & - \int_{\mathbb{Z}^+ \times [0, t]} N^2 \left[ \kappa_2 \left( Z_{S_T}^N - \frac{1}{N} z_S - Z_P^N(s) \right) + \frac{1}{N} \kappa_4 Z_P^N(s) \right. \\ & \left. - \kappa_1 z_S \left( Z_{E_T}^N - Z_{S_T}^N + \frac{1}{N} z_S + Z_P^N(s) \right) \right] \Gamma^N(dz_S \times ds). \end{aligned}$$

$\{Z_P^N\}$  and  $\{\Gamma^N\}$  are relatively compact in  $D_{\mathbb{R}^+}([0, \infty))$  and  $\mathcal{L}$ , respectively, where  $D_{\mathbb{R}^+}([0, \infty))$  is the space of cadlag functions with  $\mathbb{R}^+$  values and  $\mathcal{L}$  is the space of measures (see Appendix B). Therefore, we can set  $(Z_P, \Gamma)$  to be a limit point of

$\{(Z_P^N, \Gamma^N)\}$  in  $D_{\mathbb{R}^+}([0, \infty)) \times \mathcal{L}$ . Using Lemma 1.5 in [46],

$$\int_{\mathbb{Z}^+ \times [0, t]} \left[ \kappa_2 \left( Z_{S_T}^N - \frac{1}{N} z_S - Z_P^N(s) \right) + \frac{1}{N} \kappa_4 Z_P^N(s) - \kappa_1 z_S \left( Z_{E_T}^N - Z_{S_T}^N + \frac{1}{N} z_S + Z_P^N(s) \right) \right] \Gamma^N(dz_S \times ds)$$

converges in distribution to

$$(64) \quad \int_{\mathbb{Z}^+ \times [0, t]} [\kappa_2 (Z_{S_T} - Z_P(s)) - \kappa_1 z_S (Z_{E_T} - Z_{S_T} + Z_P(s))] \Gamma(dz_S \times ds).$$

After dividing (63) by  $N^2$  and letting  $N$  go to infinity, the above term (64) becomes zero for all  $t > 0$ . Using Lemma 1.4 in [46], there exists  $\mu_{(\cdot)}$  such that  $\Gamma(dz_S \times ds) = \mu_{Z_P(s)}(dz_S) ds$ , and we get

$$(65) \quad \int_0^t \int_{\mathbb{Z}^+} [\kappa_2 (Z_{S_T} - Z_P(s)) - \kappa_1 z_S (Z_{E_T} - Z_{S_T} + Z_P(s))] \mu_{Z_P(s)}(dz_S) ds = 0$$

with probability one.

Then, the average of fast species ( $\bar{Z}_S$ ) is expressed in terms of the slow species ( $Z_P$ ) as

$$(66) \quad \bar{Z}_S(s) \equiv \int_{\mathbb{Z}^+} z_S \mu_{Z_P(s)}(dz_S) = \frac{\kappa_2 (Z_{S_T} - Z_P(s))}{\kappa_1 (Z_{E_T} - Z_{S_T} + Z_P(s))},$$

which is given in the main text (17). Note that  $\mu_{Z_P(s)}$  is a local-averaging distribution and the Poisson distribution with mean  $\bar{Z}_S(s)$  because the limit of  $A_N f(z)/N^2$  in (62) is the infinitesimal generator of the Poisson process. For more details of conditions for averaging, please see section 5 in [34] and [5, 35].

Next, to derive the approximate averaged value of the fast species (33) of section 3, we substitute  $\frac{1}{N} z_S$  to  $\frac{1}{N_0} z_S$  and  $Z_{S_T}^N$  to  $\mathcal{Z}_{S_T}^N$  in (63) and construct a new martingale corresponding to  $Z_S^N$  in (28),

$$(67) \quad M^N(t) = Z_S^N(t) - Z_S^N(0) - \int_{\mathbb{Z}^+ \times [0, t]} N^2 \left[ \kappa_2 \left( \mathcal{Z}_{S_T}^N - \frac{1}{N_0} z_S - Z_P^N(s) \right) + \frac{1}{N} \kappa_4 Z_P^N(s) - \kappa_1 z_S \left( Z_{E_T}^N - \mathcal{Z}_{S_T}^N + \frac{1}{N_0} z_S + Z_P^N(s) \right) \right] \Gamma^N(dz_S \times ds),$$

where  $\Gamma^N$  is an occupation measure of  $Z_S^N$ .  $\{Z_P^N\}$  and  $\{\Gamma^N\}$  are relatively compact, since  $Z_P^N$  and  $Z_S^N$  are bounded by  $\mathcal{Z}_{S_T}^N \leq Z_{S_T}$  and  $N_0 \mathcal{Z}_{S_T}^N \leq N_0 Z_{S_T}$  as seen in (27), respectively. Dividing (67) by  $N^2$  and taking a limit, we get

$$\int_0^t \int_{\mathbb{Z}^+} \left[ \kappa_2 \left( \mathcal{Z}_{S_T} - \frac{1}{N_0} z_S - Z_P(s) \right) - \kappa_1 z_S \left( Z_{E_T} - \mathcal{Z}_{S_T} + \frac{1}{N_0} z_S + Z_P(s) \right) \right] \mu_{Z_P(s)}(dz_S) ds = 0$$

as we derived (65). Differentiating with respect to  $t$  and replacing the time variable by  $s$ , the rewritten equation becomes

$$\int_{\mathbb{Z}^+} \left[ \frac{1}{N_0} z_S^2 + \left( Z_{E_T} - Z_{S_T} + Z_P(s) + \frac{K_d}{N_0} \right) z_S - K_d (Z_{S_T} - Z_P(s)) \right] \mu_{Z_P(s)}(dz_S) = 0,$$

where  $K_d = \frac{\kappa_2}{\kappa_1}$ .

We derive an approximate averaged value for  $Z_S^N$  in the limit,

$$\int_{\mathbb{Z}^+} z_S \mu_{Z_P(s)}(dz_S) \approx - \frac{Z_{E_T} - Z_{S_T} + Z_P(s) + \frac{K_d}{N_0}}{2/N_0} + \frac{\sqrt{\left( Z_{E_T} - Z_{S_T} + Z_P(s) + \frac{K_d}{N_0} \right)^2 + \frac{4K_d}{N_0} (Z_{S_T} - Z_P(s))}}{2/N_0},$$

by assuming  $\int_{\mathbb{Z}^+} z_S^2 \mu_{Z_P(s)}(dz_S) \approx \left( \int_{\mathbb{Z}^+} z_S \mu_{Z_P(s)}(dz_S) \right)^2$  in the limit. In Appendix D, we will show that this assumption does not cause any error up to the order of magnitude we are interest in.

**Appendix B. Relative compactness of  $\{Z_P^N\}$  and  $\{\Gamma^N\}$ .** Here, we will show that  $\{Z_P^N\}$  and  $\{\Gamma^N\}$  in Appendix A are relatively compact in  $D_{\mathbb{R}^+}([0, \infty))$  and  $\mathcal{L}$ , respectively, where  $D_{\mathbb{R}^+}([0, \infty))$  is the space of cadlag functions with  $\mathbb{R}^+$  values and  $\mathcal{L}$  is the space of measures. Since  $Z_P^N(t) \leq Z_{S_T}^N$  and  $Z_{S_T}^N \rightarrow Z_{S_T}$  as  $N \rightarrow \infty$ ,  $Z_P^N(t)$  is bounded for all  $t \in [0, \infty)$ , and thus  $\{Z_P^N(t)\}$  is relatively compact. We will show that for  $t \in [0, \infty)$  and for fixed  $\delta > 0$ , there exists  $r$  such that

$$\sup_N P \left( \int_0^t 1_{[r, \infty)}(Z_S^N(s)) ds > \delta \right) < \delta.$$

Since  $\int_0^t 1_{[r, \infty)}(Z_S^N(s)) ds \leq \int_0^t \frac{Z_S^N(s)}{r} ds$ , we will show that we can set  $P(\int_0^t \frac{Z_S^N(s)}{r} ds > \delta)$  small enough by choosing an appropriate value for  $r$ . We have

$$\begin{aligned} P \left( \int_0^t \frac{Z_S^N(s)}{r} ds > \delta \right) &\leq P \left( \inf_{t \in [0, \infty)} Z_E^N(t) \leq \eta \right) + P \left( \int_0^t Z_S^N(s) Z_E^N(s) ds > r\delta\eta \right) \\ &\leq P \left( \inf_{t \in [0, \infty)} Z_E^N(t) \leq \eta \right) + \frac{1}{r\delta\eta} E \left[ \int_0^t Z_S^N(s) Z_E^N(s) ds \right]. \end{aligned}$$

If  $Z_E^N(0) \neq 0$  and  $E[\int_0^t Z_S^N(s) Z_E^N(s) ds] < \infty$ , we can set  $\eta$  small enough and  $r$  large enough so that both probabilities on the right-hand side become small. Then  $Z_S^N(t)$  is stochastically bounded for  $t \in [0, \infty)$ , and by Lemma 1.1 in [46]  $\{\Gamma^N\}$  is relatively compact. Now, we will show that  $E[\int_0^t Z_S^N(s) Z_E^N(s) ds] < \infty$ . Taking the expectation on both sides of the equation for  $Z_C^N(t)$  in (7) and rearranging terms, we have

$$\begin{aligned} E \left[ \int_0^t \kappa_1 Z_S^N(s) Z_E^N(s) ds \right] &= \frac{1}{N} E [Z_C^N(t)] - \frac{1}{N} E [Z_C^N(0)] + E \left[ \int_0^t \kappa_2 Z_C^N(s) ds \right] \\ &\quad + \frac{1}{N} E \left[ \int_0^t \kappa_3 Z_C^N(s) ds \right]. \end{aligned}$$

The right-hand side is bounded since for all  $t$ ,  $Z_C^N(t) \leq Z_{E_T}^N$ , and this converges to  $Z_{E_T} < \infty$  as  $N \rightarrow \infty$ . Note that we showed relative compactness of  $\{\Gamma^N\}$  when  $Z_E^N(0) \neq 0$ . If  $Z_E^N(0) = 0$ , we need additional assumption that  $Z_S^N(t)$  is stochastically bounded for all  $t \in [0, \infty)$ .

**Appendix C. Error analysis for  $Z_P$  in section 2.** To analyze the error of the process  $Z_P$  of (23) in approximating  $Z_P^{N_0}$  of the full model in (12) with  $N = N_0$ , we use the technique developed in [2]. To this end, we derive a family of process  $Z_P^N$  by replacing  $N_0$  in (23) with the parameter  $N$  as

$$(68) \quad Z_P^N(t) = Z_P^N(0) + N^{-1}R_3^t(N\kappa_3Z_C^N) - N^{-1}R_4^t(N\kappa_4Z_P^N),$$

where

$$(69) \quad Z_C^N(t) = Z_{S_T}^N - Z_P^N(t).$$

We define  $Z_{S_T}^N \equiv Z_C^N(0) + Z_P^N(0)$  so that  $Z_{S_T}^{N_0} = Z_{S_T}$ . In this way, (68)–(69) with  $N = N_0$  become equivalent to the approximate model in (23)–(24). Furthermore,  $Z_C^N(t) \rightarrow \bar{Z}_C(t)$  as  $N \rightarrow \infty$  so that  $Z_P^N$  in (68) and  $Z_P$  in (12) of the full model have the same limit  $Z_P$  in (21). Since  $Z_P^N(t) - Z_P(t) \rightarrow 0$ , we define an error between  $Z_P^N$  and  $Z_P$  as

$$(70) \quad \mathbb{E}^N(t) \equiv N(Z_P^N(t) - Z_P(t))$$

to get the asymptotic behavior of the error between  $Z_P^N$  and  $Z_P$  of order  $N^{-1}$ . To find an approximate value of  $\mathbb{E}^{N_0}(t)$ , we derive a limiting behavior of  $\mathbb{E}^N$  as  $N \rightarrow \infty$ . We rewrite the reaction terms for  $Z_P^N$  in (12) as the following process, which has the same probability distribution with that in (12):

$$(71) \quad Z_P^N(t) = Z_P^N(0) + \frac{1}{N}Y_{3,1} \left( \int_0^t N\kappa_3Z_C^N(s) \wedge N\kappa_3Z_C^N(s) ds \right) \\ + \frac{1}{N}Y_{3,2} \left( \int_0^t (N\kappa_3Z_C^N(s) - N\kappa_3Z_C^N(s) \wedge N\kappa_3Z_C^N(s)) ds \right) \\ - \frac{1}{N}Y_{4,1} \left( \int_0^t N\kappa_4Z_P^N(s) \wedge N\kappa_4Z_P^N(s) ds \right) \\ - \frac{1}{N}Y_{4,2} \left( \int_0^t (N\kappa_4Z_P^N(s) - N\kappa_4Z_P^N(s) \wedge N\kappa_4Z_P^N(s)) ds \right),$$

where  $A \wedge B \equiv \min(A, B)$ . Similarly, we rewrite the equation for  $Z_P^N$  in (68) as the following process:

$$(72) \quad Z_P^N(t) = Z_P^N(0) + \frac{1}{N}Y_{3,1} \left( \int_0^t N\kappa_3Z_C^N(s) \wedge N\kappa_3Z_C^N(s) ds \right) \\ + \frac{1}{N}Y_{3,3} \left( \int_0^t (N\kappa_3Z_C^N(s) - N\kappa_3Z_C^N(s) \wedge N\kappa_3Z_C^N(s)) ds \right) \\ - \frac{1}{N}Y_{4,1} \left( \int_0^t N\kappa_4Z_P^N(s) \wedge N\kappa_4Z_P^N(s) ds \right) \\ - \frac{1}{N}Y_{4,3} \left( \int_0^t (N\kappa_4Z_P^N(s) - N\kappa_4Z_P^N(s) \wedge N\kappa_4Z_P^N(s)) ds \right).$$

Subtracting (72) from (71),

$$\begin{aligned}
(73) \quad Z_P^N(t) - \mathbb{Z}_P^N(t) &= \frac{1}{N} Y_{3,2} \left( \int_0^t (N\kappa_3 Z_C^N(s) - N\kappa_3 Z_C^N(s) \wedge N\kappa_3 \mathbb{Z}_C^N(s)) ds \right) \\
&\quad - \frac{1}{N} Y_{3,3} \left( \int_0^t (N\kappa_3 \mathbb{Z}_C^N(s) - N\kappa_3 Z_C^N(s) \wedge N\kappa_3 \mathbb{Z}_C^N(s)) ds \right) \\
&\quad - \frac{1}{N} Y_{4,2} \left( \int_0^t (N\kappa_4 Z_P^N(s) - N\kappa_4 Z_P^N(s) \wedge N\kappa_4 \mathbb{Z}_P^N(s)) ds \right) \\
&\quad + \frac{1}{N} Y_{4,3} \left( \int_0^t (N\kappa_4 \mathbb{Z}_P^N(s) - N\kappa_4 Z_P^N(s) \wedge N\kappa_4 \mathbb{Z}_P^N(s)) ds \right).
\end{aligned}$$

Taking the reaction terms in (73) and subtracting their propensity functions, we define the following martingale:

$$\begin{aligned}
\mathbb{M}^N(t) &= \frac{1}{N} \tilde{Y}_{3,2} \left( \int_0^t (N\kappa_3 Z_C^N(s) - N\kappa_3 Z_C^N(s) \wedge N\kappa_3 \mathbb{Z}_C^N(s)) ds \right) \\
&\quad - \frac{1}{N} \tilde{Y}_{3,3} \left( \int_0^t (N\kappa_3 \mathbb{Z}_C^N(s) - N\kappa_3 Z_C^N(s) \wedge N\kappa_3 \mathbb{Z}_C^N(s)) ds \right) \\
&\quad - \frac{1}{N} \tilde{Y}_{4,2} \left( \int_0^t (N\kappa_4 Z_P^N(s) - N\kappa_4 Z_P^N(s) \wedge N\kappa_4 \mathbb{Z}_P^N(s)) ds \right) \\
&\quad + \frac{1}{N} \tilde{Y}_{4,3} \left( \int_0^t (N\kappa_4 \mathbb{Z}_P^N(s) - N\kappa_4 Z_P^N(s) \wedge N\kappa_4 \mathbb{Z}_P^N(s)) ds \right),
\end{aligned}$$

where  $\tilde{Y}(u) = Y(u) - u$ . A quadratic variation of the martingale is (cf. [35])

$$\begin{aligned}
[\mathbb{M}^N]_t &= \frac{1}{N^2} Y_{3,2} \left( \int_0^t (N\kappa_3 Z_C^N(s) - N\kappa_3 Z_C^N(s) \wedge N\kappa_3 \mathbb{Z}_C^N(s)) ds \right) \\
&\quad + \frac{1}{N^2} Y_{3,3} \left( \int_0^t (N\kappa_3 \mathbb{Z}_C^N(s) - N\kappa_3 Z_C^N(s) \wedge N\kappa_3 \mathbb{Z}_C^N(s)) ds \right) \\
&\quad + \frac{1}{N^2} Y_{4,2} \left( \int_0^t (N\kappa_4 Z_P^N(s) - N\kappa_4 Z_P^N(s) \wedge N\kappa_4 \mathbb{Z}_P^N(s)) ds \right) \\
&\quad + \frac{1}{N^2} Y_{4,3} \left( \int_0^t (N\kappa_4 \mathbb{Z}_P^N(s) - N\kappa_4 Z_P^N(s) \wedge N\kappa_4 \mathbb{Z}_P^N(s)) ds \right).
\end{aligned}$$

Define a function for  $Z_C^N$  in (13) and  $\mathbb{Z}_C^N$  in (69) as

$$\begin{aligned}
F^N(z) &= Z_{S_T}^N - \frac{1}{N} z_S - z_P, \\
\bar{F}^N(z_P) &= \mathbb{Z}_{S_T}^N - z_P
\end{aligned}$$

so that  $F^N(Z_C^N(s)) = Z_C^N(s)$  and  $\bar{F}^N(\mathbb{Z}_P^N(s)) = \mathbb{Z}_C^N(s)$ . As  $N \rightarrow \infty$ ,  $[\mathbb{M}^N]_t$  is asymptotic to

$$\begin{aligned}
&\frac{1}{N} \int_0^t \kappa_3 |Z_C^N(s) - \mathbb{Z}_C^N(s)| ds + \frac{1}{N} \int_0^t \kappa_4 |Z_P^N(s) - \mathbb{Z}_P^N(s)| ds \\
&= \frac{1}{N} \int_0^t \kappa_3 [F^N(Z_C^N(s)) - \bar{F}^N(\mathbb{Z}_P^N(s))] + [\bar{F}^N(\mathbb{Z}_P^N(s)) - \bar{F}^N(\mathbb{Z}_P^N(s))] ds \\
&\quad + \frac{1}{N} \int_0^t \kappa_4 |Z_P^N(s) - \mathbb{Z}_P^N(s)| ds,
\end{aligned}$$

where we use the fact that  $(A - A \wedge B) + (B - A \wedge B) = |A - B|$ . Then as  $N \rightarrow \infty$ ,  $[N \cdot \mathbb{M}^N]_t$  is asymptotic to

$$(74) \quad \int_0^t \kappa_3 \left| N [F^N (Z^N(s)) - \bar{F}^N (Z_P^N(s))] + \frac{d\bar{F}^N (Z_P^N(s))}{dZ_P^N(s)} \mathbb{E}^N(s) \right| ds + \int_0^t \kappa_4 |\mathbb{E}^N(s)| ds.$$

Subtracting and adding the propensity functions and using the fact that  $(A - A \wedge B) - (B - A \wedge B) = (A - B)$ , (73) can be rewritten as

$$(75) \quad Z_P^N(t) - \mathbb{Z}_P^N(t) = \mathbb{M}^N(t) + \int_0^t [\kappa_3 (Z_C^N(s) - \mathbb{Z}_C^N(s)) - \kappa_4 (Z_P^N(s) - \mathbb{Z}_P^N(s))] ds \\ = \mathbb{M}^N(t) + \int_0^t \kappa_3 (F^N (Z^N(s)) - \bar{F}^N (Z_P^N(s))) ds \\ + \int_0^t \kappa_3 (\bar{F}^N (Z_P^N(s)) - \bar{F}^N (\mathbb{Z}_P^N(s))) ds \\ - \int_0^t \kappa_4 (Z_P^N(s) - \mathbb{Z}_P^N(s)) ds.$$

Multiplying (75) by  $N$ , we get

$$(76) \quad \mathbb{E}^N(t) \approx N \cdot \mathbb{M}^N(t) + \int_0^t \kappa_3 \left\{ N [F^N (Z^N(s)) - \bar{F}^N (Z_P^N(s))] + \frac{d\bar{F}^N (Z_P^N(s))}{dZ_P^N(s)} \mathbb{E}^N(s) \right\} ds - \int_0^t \kappa_4 \mathbb{E}^N(s) ds.$$

Assuming that  $\mathbb{E}^N \Rightarrow \mathbb{E}$  as  $N \rightarrow \infty$ , where  $\Rightarrow$  implies convergence in distribution (or weak convergence), we get

$$(77) \quad N [F^N (Z^N(s)) - \bar{F}^N (Z_P^N(s))] = N \left[ Z_{S_t}^N - \frac{1}{N} Z_S^N(s) - Z_P^N(s) - \mathbb{Z}_{S_t}^N + Z_P^N(s) \right] \\ = N [X_S(0)/N - Z_S^N(s)/N] \rightarrow X_S(0) - \bar{Z}_S(s)$$

and

$$(78) \quad \frac{d\bar{F}^N (Z_P^N(s))}{dZ_P^N(s)} \mathbb{E}^N(s) \rightarrow -\mathbb{E}(s).$$

Substituting (77) and (78) into (74) and applying the martingale central limit theorem,  $N \cdot \mathbb{M}^N \Rightarrow \mathbb{M}$  as  $N \rightarrow \infty$ , where  $\mathbb{M}$  is a Gaussian process with its quadratic variation

$$[\mathbb{M}]_t = \int_0^t \{ \kappa_3 |X_S(0) - \bar{Z}_S(s) - \mathbb{E}(s)| + \kappa_4 |\mathbb{E}(s)| \} ds.$$

Therefore, as  $N \rightarrow \infty$ , (76) converges in distribution to

$$\begin{aligned} \mathbb{E}(t) &= \int_0^t \sqrt{\kappa_3 |X_S(0) - \bar{Z}_S(s) - \mathbb{E}(s)| + \kappa_4 |\mathbb{E}(s)|} dW(s) \\ &\quad + \int_0^t \{ \kappa_3 (X_S(0) - \bar{Z}_S(s) - \mathbb{E}(s)) - \kappa_4 \mathbb{E}(s) \} ds, \end{aligned}$$

where  $W$  is a standard Brownian motion and thus  $\mathbb{E}(t) = O(1)$ . Approximating  $\mathbb{E}^{N_0}(t) \approx \mathbb{E}(t)$  as suggested in [35] and using (70), we obtain

$$X_P(t) \approx N_0 Z_P(N_0^{-3}t) + \mathbb{E}(N_0^{-3}t),$$

which indicates that  $X_P(t) = N_0 Z_P(N_0^{-3}t) + O(1)$ .

**Appendix D. Error analysis for  $Z_P$  in section 3.** We again use the technique developed in [2] to derive the error between  $Z_P$  of the approximate model (35) and  $Z_P^{N_0}$  of the full model (12) with  $N = N_0$ . To this end, we derive a family of the processes  $Z_P^N$  by replacing  $N_0$  of  $Z_P$  in (35) by a parameter  $N$  as

$$(79) \quad Z_P^N(t) = Z_P^N(0) + N^{-1}R_3^t(N\kappa_3 Z_C^N) - N^{-1}R_4^t(N\kappa_4 Z_P^N),$$

where

$$\begin{aligned} Z_C^N(s) &= \frac{Z_{E_T}^N + Z_{S_T}^N - Z_P^N(s) + \frac{K_d}{N}}{2} \\ &\quad - \frac{\sqrt{(Z_{E_T}^N + Z_{S_T}^N - Z_P^N(s) + \frac{K_d}{N})^2 - 4Z_{E_T}^N(Z_{S_T}^N - Z_P^N(s))}}{2}. \end{aligned}$$

Note that  $Z_C^{N_0}(t) = Z_C(t)$  since  $Z_{S_T}^{N_0} = Z_{S_T}$ . Then,  $Z_P^N(t)$  of (79) when  $N = N_0$  becomes equivalent to  $Z_P$  of (35). That is, the family of process  $(Z_P^N)$  includes the approximate process  $Z_P$  of (35). Since  $Z_C^N(t) \rightarrow \bar{Z}_C(t)$  in (20) as  $N \rightarrow \infty$ ,  $Z_P^N(t)$  and  $Z_P^N(t)$  of the full model in (12) converge to the same limit  $Z_P(t)$  in (21) as  $N \rightarrow \infty$ . Since  $Z_P^N - Z_P \rightarrow 0$  as  $N \rightarrow \infty$ , we define an error as

$$\mathcal{E}^N(t) \equiv N (Z_P^N(t) - Z_P(t))$$

to get the asymptotic behavior of the error of order  $\frac{1}{N}$  in  $Z_P^N(t) - Z_P(t)$ .

To find an approximate of  $\mathcal{E}^{N_0}(t)$ , we investigate an asymptotic behavior of  $\mathcal{E}^N$  as  $N \rightarrow \infty$ . As we derived (73), we derive the following equation after replacing  $Z_P^N$  and  $Z_C^N$  by  $Z_P^N$  and  $Z_C^N$  in (73):

$$\begin{aligned} (80) \quad Z_P^N(t) - Z_P(t) &= \frac{1}{N} Y_{3,2} \left( \int_0^t (N\kappa_3 Z_C^N(s) - N\kappa_3 Z_C^N(s) \wedge N\kappa_3 Z_C^N(s)) ds \right) \\ &\quad - \frac{1}{N} Y_{3,3} \left( \int_0^t (N\kappa_3 Z_C^N(s) - N\kappa_3 Z_C^N(s) \wedge N\kappa_3 Z_C^N(s)) ds \right) \\ &\quad - \frac{1}{N} Y_{4,2} \left( \int_0^t (N\kappa_4 Z_P^N(s) - N\kappa_4 Z_P^N(s) \wedge N\kappa_4 Z_P^N(s)) ds \right) \\ &\quad + \frac{1}{N} Y_{4,3} \left( \int_0^t (N\kappa_4 Z_P^N(s) - N\kappa_4 Z_P^N(s) \wedge N\kappa_4 Z_P^N(s)) ds \right). \end{aligned}$$

Using reaction terms in (80) and subtracting them by their propensity functions, define a martingale as

$$\begin{aligned} \mathcal{M}^N(t) \equiv & \frac{1}{N} \tilde{Y}_{3,2} \left( \int_0^t (N\kappa_3 Z_C^N(s) - N\kappa_3 Z_C^N(s) \wedge N\kappa_3 \mathcal{Z}_C^N(s)) ds \right) \\ & - \frac{1}{N} \tilde{Y}_{3,3} \left( \int_0^t (N\kappa_3 \mathcal{Z}_C^N(s) - N\kappa_3 Z_C^N(s) \wedge N\kappa_3 \mathcal{Z}_C^N(s)) ds \right) \\ & - \frac{1}{N} \tilde{Y}_{4,2} \left( \int_0^t (N\kappa_4 Z_P^N(s) - N\kappa_4 Z_P^N(s) \wedge N\kappa_4 \mathcal{Z}_P^N(s)) ds \right) \\ & + \frac{1}{N} \tilde{Y}_{4,3} \left( \int_0^t (N\kappa_4 \mathcal{Z}_P^N(s) - N\kappa_4 Z_P^N(s) \wedge N\kappa_4 \mathcal{Z}_P^N(s)) ds \right), \end{aligned}$$

where  $\tilde{Y}(u) = Y(u) - u$ . Define

$$\begin{aligned} \tilde{F}^N(z_P) \equiv & \frac{Z_{E_T}^N + Z_{S_T}^N - z_P + \frac{K_d}{N}}{2} \\ & - \frac{\sqrt{(Z_{E_T}^N + Z_{S_T}^N - z_P + \frac{K_d}{N})^2 - 4Z_{E_T}^N (Z_{S_T}^N - z_P)}}{2}, \end{aligned}$$

so that  $\tilde{F}^N(\mathcal{Z}_P^N(s)) = \mathcal{Z}_C^N(s)$ . As we get (74),  $[N \cdot \mathcal{M}^N]_t$  is asymptotic to

$$\int_0^t \kappa_3 \left| N \left[ F^N(Z^N(s)) - \tilde{F}^N(\mathcal{Z}_P^N(s)) \right] + \frac{d\tilde{F}^N(\mathcal{Z}_P^N(s))}{d\mathcal{Z}_P^N(s)} \mathcal{E}^N(s) \right| ds + \int_0^t \kappa_4 |\mathcal{E}^N(s)| ds.$$

Next, we show that

$$(81) \quad \int_0^t N \left[ F^N(Z^N(s)) - \tilde{F}^N(\mathcal{Z}_P^N(s)) \right] ds \rightarrow 0$$

as  $N \rightarrow \infty$ . Denoting

$$(82) \quad A^N(z_P) = Z_{E_T}^N - Z_{S_T}^N + z_P + \frac{K_d}{N},$$

$$(83) \quad B^N(z_P) = Z_{S_T}^N - z_P,$$

we have

$$\begin{aligned} (84) \quad N \left( F^N(z) - \tilde{F}^N(z_P) \right) &= -z_S - N \left( \frac{A^N(z_P) - \sqrt{A^N(z_P)^2 + \frac{4}{N} K_d B^N(z_P)}}{2} \right) \\ &= \left[ -z_S + \frac{K_d B^N(z_P)}{A^N(z_P)} \right] \\ &\quad + \left[ -\frac{K_d B^N(z_P)}{A^N(z_P)} + \frac{2K_d B^N(z_P)}{A^N(z_P) + \sqrt{A^N(z_P)^2 + \frac{4}{N} K_d B^N(z_P)}} \right] \\ &= \left[ -z_S + \frac{K_d B^N(z_P)}{A^N(z_P)} \right] + \frac{K_d B^N(z_P)}{A^N(z_P)} \cdot \frac{-\frac{4}{N} \frac{K_d B^N(z_P)}{A^N(z_P)^2}}{\left( 1 + \sqrt{1 + \frac{4}{N} \frac{K_d B^N(z_P)}{A^N(z_P)^2}} \right)^2}. \end{aligned}$$



The second term on the right is of order  $\frac{1}{N}$  in (84). The integral of the first term in (84) becomes

$$\begin{aligned} & \int_0^t \left[ -Z_S^N(s) + \frac{K_d B^N(Z_P^N(s))}{A^N(Z_P^N(s))} \right] ds \\ &= \int_0^t \left[ -Z_S^N(s) + \frac{\kappa_2 (Z_{S_T}^N - Z_P^N(s))}{\kappa_1 (Z_{E_T}^N - Z_{S_T}^N + Z_P^N(s) + \frac{K_d}{N})} \right] ds, \end{aligned}$$

and this converges to 0 as  $N \rightarrow \infty$  using (65) and (66), which shows (81).

Using  $\tilde{F}^N(z_P) \rightarrow F(z_P) \equiv Z_{S_T} - z_P$  and  $Z_P^N \rightarrow Z_P$ ,

$$(85) \quad \frac{d\tilde{F}^N(Z_P^N(s))}{dZ_P^N(s)} \rightarrow \frac{dF(Z_P(s))}{dZ_P(s)} = -1$$

as  $N \rightarrow \infty$ . Therefore, using the martingale central limit theorem,  $N \cdot \mathcal{M}^N \Rightarrow \mathcal{M}$  as  $N \rightarrow \infty$ , which is a Gaussian process with its quadratic variation

$$[\mathcal{M}]_t = \int_0^t (\kappa_3 + \kappa_4) |\mathcal{E}(s)| ds,$$

where  $\mathcal{E}^N(s) \Rightarrow \mathcal{E}(s)$  as  $N \rightarrow \infty$ . As we derive (76), we can derive an equation for  $\mathcal{E}^N(t)$  by replacing  $\mathbb{E}^N$ ,  $\mathbb{M}^N$ ,  $\tilde{F}^N$ , and  $Z_P^N$  with  $\mathcal{E}^N$ ,  $\mathcal{M}^N$ ,  $\tilde{F}^N$ , and  $Z_P^N$ , respectively. Then,  $\mathcal{E}^N$  is asymptotically equal to

$$(86) \quad \mathcal{E}^N(t) \approx \int_0^t \kappa_3 \left\{ N \left[ F^N(Z^N(s)) - \tilde{F}^N(Z_P^N(s)) \right] + \frac{d\tilde{F}^N(Z_P^N(s))}{dZ_P^N(s)} \mathcal{E}^N(s) \right\} ds \\ - \int_0^t \kappa_4 \mathcal{E}^N(s) ds + N \cdot \mathcal{M}^N(t).$$

Using (81) and (85), (86) converges in distribution to

$$\mathcal{E}(t) = \int_0^t \sqrt{(\kappa_3 + \kappa_4) |\mathcal{E}(s)|} dW(s) - \int_0^t (\kappa_3 + \kappa_4) \mathcal{E}(s) ds$$

as  $N \rightarrow \infty$  where  $W$  is a standard Brownian motion. Again, we approximate  $\mathcal{E}^{N_0}(t) \approx \mathcal{E}(t)$  as suggested in [35] and thus we get

$$X_P(t) \approx N_0 Z_P(N_0^{-3}t) + \mathcal{E}(N_0^{-3}t).$$

Since  $\mathcal{E}(0) = 0$  and diffusion and drift terms are proportional to  $\mathcal{E}(s)$ ,  $\mathcal{E}(t) = 0$ , which indicates that  $X_P(t) = N_0 Z_P(N_0^{-3}t) + o(1)$ .

**Acknowledgments.** We are grateful to the MBI for supporting our attendance at the workshop in 2015, where collaboration for this work began. We also thank Wanmo Kang for valuable discussions.

#### REFERENCES

- [1] A. AGARWAL, R. ADAMS, G. C. CASTELLANI, AND H. Z. SHOUVAL, *On the precision of quasi steady state assumptions in stochastic dynamics*, J. Chem. Phys., 137 (2012).

- [2] D. F. ANDERSON, A. GANGULY, AND T. G. KURTZ, *Error analysis of tau-leap simulation methods*, *Ann. Appl. Probab.*, 21 (2011), pp. 2226–2262.
- [3] D. F. ANDERSON AND D. J. HIGHAM, *Multilevel Monte Carlo for continuous time Markov chains, with applications in biochemical kinetics*, *SIAM Multiscale Model. Simul.*, 10 (2012), pp. 146–179.
- [4] D. F. ANDERSON AND M. KOYAMA, *Weak error analysis of numerical methods for stochastic models of population processes*, *SIAM Multiscale Model. Simul.*, 10 (2012), pp. 1493–1524.
- [5] K. BALL, T. G. KURTZ, L. POPOVIC, AND G. REMPALA, *Asymptotic analysis of multiscale approximations to reaction networks*, *Ann. Appl. Probab.*, 16 (2006), pp. 1925–1961.
- [6] D. BARIK, M. R. PAUL, W. T. BAUMANN, Y. CAO, AND J. J. TYSON, *Stochastic simulation of enzyme-catalyzed reactions with disparate timescales*, *Biophys. J.*, 95 (2008), pp. 3563–3574.
- [7] B. D. BENNETT, E. H. KIMBALL, M. GAO, R. OSTERHOUT, S. J. VAN DIEN, AND J. D. RABINOWITZ, *Absolute metabolite concentrations and implied enzyme active site occupancy in *Escherichia coli**, *Nat. Chem. Biol.*, 5 (2009), pp. 593–599.
- [8] N. BERGLUND AND B. GENTZ, *Geometric singular perturbation theory for stochastic differential equations*, *J. Differential Equations*, 191 (2003), pp. 1–54.
- [9] R. BUNDSCHUH, F. HAYOT, AND C. JAYAPRAKASH, *The role of dimerization in noise reduction of simple genetic networks*, *J. Theoret. Biol.*, 220 (2003), pp. 261–269.
- [10] X. CAI AND X. WANG, *Stochastic modeling and simulation of gene networks—a review of the state-of-the-art research on stochastic simulations*, *IEEE Signal Process. Mag.*, 24 (2007), pp. 27–36.
- [11] Y. CAO, D. T. GILLESPIE, AND L. R. PETZOLD, *The slow-scale stochastic simulation algorithm*, *J. Chem. Phys.*, 122 (2005).
- [12] R. R. COIFMAN, I. G. KEVREKIDIS, S. LAFON, M. MAGGIONI, AND B. NADLER, *Diffusion maps, reduction coordinates, and low dimensional representation of stochastic systems*, *SIAM Multiscale Model. Simul.*, 7 (2008), pp. 842–864.
- [13] S. L. COTTER, *Constrained approximation of effective generators for multiscale stochastic reaction networks and application to conditioned path sampling*, *J. Comput. Phys.*, 323 (2016), pp. 265–282.
- [14] S. L. COTTER, K. C. ZYGALAKIS, I. G. KEVREKIDIS, AND R. ERBAN, *A constrained approach to multiscale stochastic simulation of chemically reacting systems*, *J. Chem. Phys.*, 135 (2011), 094102.
- [15] R. DURRETT, *Essentials of Stochastic Processes*, Springer, New York, 2012.
- [16] W. E, D. LIU, AND E. VANDEN-EIJNDEN, *Nested stochastic simulation algorithm for chemical kinetic systems with disparate rates.*, *J. Chem. Phys.*, 123 (2005), 194107.
- [17] R. ERBAN AND S. J. CHAPMAN, *Stochastic modelling of reaction–diffusion processes: Algorithms for bimolecular reactions*, *Phys. Biol.*, 6 (2009), 046001.
- [18] S. N. ETHIER AND T. G. KURTZ, *Markov Processes: Characterization and Convergence*, Wiley Ser. Probab. Stat. 282, Wiley, New York, 1986.
- [19] A. GANGULY, D. ALTINTAN, AND H. KOEPL, *Error bound and simulation algorithm for piecewise deterministic approximations of stochastic reaction systems*, in *Proceedings of the American Control Conference*, IEEE, 2015, pp. 787–792.
- [20] A. GANGULY, D. ALTINTAN, AND H. KOEPL, *Jump-diffusion approximation of stochastic reaction dynamics: Error bounds and algorithms*, *SIAM Multiscale Model. Simul.*, 13 (2015), pp. 1390–1419.
- [21] D. T. GILLESPIE, *Stochastic simulation of chemical kinetics*, *Ann. Rev. Phys. Chem.*, 58 (2007), pp. 35–55.
- [22] D. T. GILLESPIE, *Deterministic limit of stochastic chemical kinetics*, *J. Phys. Chem. B*, 113 (2009), pp. 1640–1644.
- [23] D. GIVON, *Strong convergence rate for two-time-scale jump-diffusion stochastic differential systems*, *SIAM Multiscale Model. Simul.*, 6 (2007), pp. 577–594.
- [24] A. GOEKE AND S. WALCHER, *A constructive approach to quasi-steady state reductions*, *J. Math. Chem.*, 52 (2014), pp. 2596–2626.
- [25] J. GOUTSIAS, *Quasiequilibrium approximation of fast reaction kinetics in stochastic biochemical systems*, *J. Chem. Phys.*, 122 (2005).
- [26] A. GUPTA AND M. KHAMMASH, *Unbiased estimation of parameter sensitivities for stochastic chemical reaction networks*, *SIAM J. Sci. Comput.*, 35 (2013), pp. A2598–A2620.
- [27] A. GUPTA AND M. KHAMMASH, *Sensitivity analysis for stochastic chemical reaction networks with multiple time-scales*, *Electron. J. Probab.*, 19 (2014), pp. 1–53.
- [28] E. L. HASELTINE AND J. B. RAWLINGS, *On the origins of approximations for stochastic chemical kinetics*, *J. Chem. Phys.*, 123 (2005), 164115.

- [29] B. HEPP, A. GUPTA, AND M. KHAMMASH, *Adaptive hybrid simulations for multiscale stochastic reaction networks*, J. Chem. Phys., 142 (2015), 034118.
- [30] J. HU, H.-W. KANG, AND H. G. OTHMER, *Stochastic analysis of reaction–diffusion processes*, Bull. Math. Biol., 76 (2014), pp. 854–894.
- [31] S. A. ISAACSON AND C. S. PESKIN, *Incorporating diffusion in complex geometries into stochastic chemical kinetics simulations*, SIAM J. Sci. Comput., 28 (2006), pp. 47–74.
- [32] T. JAHNKE, *On reduced models for the chemical master equation*, SIAM Multiscale Model. Simul., 9 (2011), pp. 1646–1676.
- [33] H.-W. KANG, *A multiscale approximation in a heat shock response model of E. coli*, BMC Syst. Biol., 6 (2012), p. 143.
- [34] H.-W. KANG AND T. G. KURTZ, *Separation of time-scales and model reduction for stochastic reaction networks*, Ann. Appl. Probab., 23 (2013), pp. 529–583.
- [35] H.-W. KANG, T. G. KURTZ, AND L. POPOVIC, *Central limit theorems and diffusion approximations for multiscale Markov chain models*, Ann. Appl. Probab., 24 (2014), pp. 721–759.
- [36] H.-W. KANG, L. ZHENG, AND H. G. OTHMER, *A new method for choosing the computational cell in stochastic reaction–diffusion systems*, J. Math. Biol., 65 (2012), pp. 1017–1099.
- [37] T. B. KEPLER AND T. C. ELSTON, *Stochasticity in transcriptional regulation: Origins, consequences, and mathematical representations*, Biophys. J., 81 (2001), pp. 3116–3136.
- [38] J. K. KIM, *Protein sequestration versus Hill-type repression in circadian clock models*, IET Syst. Biol., 10 (2016), pp. 125–135.
- [39] J. K. KIM AND D. B. FORGER, *A mechanism for robust circadian timekeeping via stoichiometric balance*, Mol. Syst. Biol., 8 (2012).
- [40] J. K. KIM, K. JOSIĆ, AND M. R. BENNETT, *The validity of quasi-steady-state approximations in discrete stochastic simulations*, Biophys. J., 107 (2014), pp. 783–793.
- [41] J. K. KIM, K. JOSIĆ, AND M. R. BENNETT, *The relationship between stochastic and deterministic quasi-steady state approximations*, BMC Syst. Biol., 9 (2015), p. 87.
- [42] J. K. KIM, Z. P. KILPATRICK, M. R. BENNETT, AND K. JOSIĆ, *Molecular mechanisms that regulate the coupled period of the mammalian circadian clock*, Biophys. J., 106 (2014), pp. 2071–2081.
- [43] T. G. KURTZ, *The relationship between stochastic and deterministic models for chemical reactions*, J. Chem. Phys., 57 (1972), pp. 2976–2978.
- [44] T. G. KURTZ, *Strong approximation theorems for density dependent markov chains*, Stoch. Proc. Appl., 6 (1978), pp. 223–240.
- [45] T. G. KURTZ, *Approximation of Population Processes*, CBMS-NSF Regional Cont. Ser. in Appl. Math. 36, SIAM, Philadelphia, 1981.
- [46] T. G. KURTZ, *Averaging for martingale problems and stochastic approximation*, in Applied Stochastic Analysis, Lecture Notes in Comput. Sci. 177, Springer, New York, 1992, pp. 186–209.
- [47] D. LIU, *Analysis of multiscale methods for stochastic dynamical systems with multiple time scales*, SIAM Multiscale Model. Simul., 8 (2010), pp. 944–964.
- [48] P. LÖTSTEDT AND L. FERM, *Dimensional reduction of the Fokker-Planck equation for stochastic chemical reactions*, SIAM Multiscale Model. Simul., 5 (2006), pp. 593–614.
- [49] S. MACNAMARA, A. M. BERSANI, K. BURRAGE, AND R. B. SIDJE, *Stochastic chemical kinetics and the total quasi-steady-state assumption: Application to the stochastic simulation algorithm and chemical master equation*, J. Chem. Phys., 129 (2008).
- [50] M. D. MICHELOTTI, M. T. HEATH, AND M. WEST, *Binning for efficient stochastic multiscale particle simulations*, SIAM Multiscale Model. Simul., 11 (2013), pp. 1071–1096.
- [51] S. PELEŠ, B. MUNSKY, AND M. KHAMMASH, *Reduction and solution of the chemical master equation using time scale separation and finite state projection*, J. Chem. Phys., 125 (2006), 204104.
- [52] P. PFAFFELHUBER AND L. POPOVIC, *Scaling limits of spatial compartment models for chemical reaction networks*, Ann. Appl. Probab., 25 (2015), pp. 3162–3208.
- [53] C. V. RAO AND A. P. ARKIN, *Stochastic chemical kinetics and the quasi-steady-state assumption: Application to the Gillespie algorithm*, J. Chem. Phys., 118 (2003), pp. 4999–5010.
- [54] H. SALIS AND Y. N. KAZNESSIS, *An equation-free probabilistic steady-state approximation: Dynamic application to the stochastic simulation of biochemical reaction networks*, J. Chem. Phys., 123 (2005), 214106.
- [55] P. THOMAS, A. V. STRAUBE, AND R. GRIMA, *Communication: Limitations of the stochastic quasi-steady-state approximation in open biochemical reaction networks*, J. Chem. Phys., 135 (2011), 181103.
- [56] P. THOMAS, A. V. STRAUBE, AND R. GRIMA, *The slow-scale linear noise approximation: An accurate, reduced stochastic description of biochemical networks under timescale separation conditions*, BMC Syst. Biol., 6 (2012).

- [57] A. N. TIKHONOV, *Systems of differential equations containing small parameters in the derivatives*, Mat. Sb. (N.S.), 31 (1952), pp. 575–586.
- [58] N. G. VAN KAMPEN, *Elimination of fast variables*, Phys. Rep., 124 (1985), pp. 69–160.
- [59] E. VANDEN-EIJNDEN, *Fast communications: Numerical techniques for multi-scale dynamical systems with stochastic effects*, Commun. Math. Sci., 1 (2003), pp. 385–391.
